1 **TITLE PAGE**

2

3 **Analysis of FGF20-regulated genes in organ of Corti progenitors by translating ribosome**  
4 **affinity purification**

5

6 Lu M. Yang<sup>1</sup>, Lisa Stout<sup>2</sup>, Michael Rauchman<sup>2</sup>, David M. Ornitz<sup>1\*</sup>

7

8 <sup>1</sup>Department of Developmental Biology, Washington University School of Medicine; St. Louis,  
9 Missouri, 63110; USA

10 <sup>2</sup>Division of Nephrology, Department of Medicine, Washington University School of Medicine; St.  
11 Louis, Missouri, 63110; USA

12

13 \*Correspondence:

14 3905 South Bldg. (campus box 8103)

15 Washington University School of Medicine

16 660 S. Euclid Avenue

17 St. Louis, MO 63110

18 Telephone: (314) 362-3908

19 Email: dornitz@wustl.edu

20

21 **Running title:** FGF20-regulated OC prosensory genes

22 **Key words:** fibroblast growth factor, cochlea, development, TRAP

23 **Key findings:**

- 24 • Translating Ribosome Affinity Purification (TRAP) with Fgf20-Cre enriches for  
25 prosensory cell mRNA
- 26 • TRAP combined with RNAseq identifies genes downstream of FGF20 during prosensory  
27 cell differentiation
- 28 • FGF20 regulates Sall1, gene implicated in human sensorineural hearing loss

29 **Grant Sponsor and Number:**

30 National Institute on Deafness and Other Communication Disorders – DC017042 (DMO)

31 Washington University Institute of Clinical and Translational Sciences and National Center for

32 Advancing Translational Sciences – CTSA grant UL1TR002345 (JIT471 to DMO)

33 March of Dimes – 6-FY13-127 (MR)

## 1 ABSTRACT

2

3 **Background:** Understanding the mechanisms that regulate hair cell (HC) differentiation in the  
4 organ of Corti (OC) is essential to designing genetic therapies for hearing loss due to HC loss or  
5 damage. We have previously identified Fibroblast Growth Factor 20 (FGF20) as having a key  
6 role in HC and supporting cell differentiation in the mouse OC. To investigate the genetic  
7 landscape regulated by FGF20 signaling in OC progenitors, we employ Translating Ribosome  
8 Affinity Purification combined with Next Generation mRNA Sequencing (TRAPseq) in the *Fgf20*  
9 lineage. **Results:** We show that TRAPseq targeting OC progenitors effectively enriched for  
10 mRNA within this rare cell population. TRAPseq identified differentially expressed genes  
11 downstream of FGF20, including *Etv4*, *Etv5*, *Etv1*, *Dusp6*, *Hey1*, *Hey2*, *Heyl*, *Tectb*, *Fat3*,  
12 *Cpxm2*, *Sall1*, *Sall3*, and cell cycle regulators such as *Cdc20*. Analysis of *Cdc20* conditional-null  
13 mice identified decreased cochlea length, while analysis of *Sall1-ΔZn<sup>2-10</sup>* mice, which harbor a  
14 mutation that causes Townes-Brocks syndrome, identified a decrease in outer hair cell number.  
15 **Conclusions:** We present two datasets: genes with enriched expression in OC progenitors, and  
16 genes regulated by FGF20 in the embryonic day 14.5 cochlea. We validate select differentially  
17 expressed genes via in situ hybridization and in vivo functional studies in mice.

## 18

## 19

## 20 INTRODUCTION

21

22 Congenital and acquired sensorineural hearing loss are common problems, yet there are no  
23 available biologically-based therapies. Congenital sensorineural hearing loss can result from  
24 defects in sensory hair cells (HCs) or specialized supporting cells (SCs) within the organ of Corti  
25 (OC) (Allen and Goldman 2019; Basch et al. 2016; Bowl and Brown 2018; Wu and Kelley 2012).  
26 Acquired sensorineural hearing loss is commonly caused by damage to HCs (Wong and Ryan  
27 2015; Yamasoba et al. 2013). In mammals, HC loss is permanent as the mammalian OC is  
28 unable to regenerate HCs (Corwin and Warchol 1991; Wong and Ryan 2015). One potential  
29 approach to treating hearing loss due to HC loss or damage is to reactivate developmental  
30 signaling pathways in latent progenitors to promote their growth and differentiation into HCs and  
31 SCs. Investigation of the developmental pathways regulating HC and SC differentiation will  
32 benefit our understanding and treatment of both congenital and acquired hearing loss.

33

1 In mouse cochlea development, Fibroblast Growth Factor 20 (FGF20) signaling via FGF  
2 receptor 1 (FGFR1) is required for the differentiation of organ of Corti progenitors (prosensory  
3 cells) into HCs and SCs, specifically outer hair cells (OHCs) and outer supporting cells (Hayashi  
4 et al. 2008; Huh et al. 2012, 2015; Ono et al. 2014; Pirvola et al. 2002). *Fgf20*-null mice (*Fgf20*  
5 <sup>-/-</sup>) are deaf, with loss of OHCs and gaps of undifferentiated cells along the length of the OC  
6 interrupting the normal patterning of HCs and SCs (Huh et al. 2012). *Fgf20*<sup>-/-</sup> cochleae also  
7 exhibit shorter cochlear length. Additionally, FGF20 is required during the initiation of HC and  
8 SC differentiation and *Fgf20*<sup>-/-</sup> mice have premature onset of HC differentiation, as well as  
9 delayed apical progression of HC differentiation and maturation (Huh et al. 2012; Yang et al.  
10 2019). However, we do not know the mechanism by which FGF20 is required for the initiation of  
11 differentiation. We hypothesize that downstream genetic targets of FGF20 signaling in  
12 prosensory cells will be candidate effectors of HC and SC differentiation. Identifying these  
13 genes will be important for advancing therapeutics in regenerating lost or damaged HCs and will  
14 provide insight into the mechanisms underlying OC phenotypes in *Fgf20*<sup>-/-</sup> mice.

15  
16 Here, we combined the Translating Ribosome Affinity Purification (TRAP) technology (Heiman  
17 et al. 2008) with Next Generation mRNA Sequencing (TRAPseq) to study changes in gene  
18 expression patterns in prosensory cells in the presence or absence of FGF20 signaling. TRAP  
19 allows the isolation of translating mRNA from specific cell populations without cell sorting or fine  
20 dissection. We used the *ROSA*<sup>tsTRAP</sup> allele (Zhou et al. 2013), which when activated by Cre  
21 recombinase, leads to the expression of a GFP-tagged ribosomal protein (L10a-eGFP).  
22 Immunoprecipitation (IP) for GFP then isolates polysomes and associated translating mRNA.  
23 We show that by targeting the expression of L10a-eGFP to prosensory cells within the  
24 cochleae, we were able to enrich for translating mRNA within this relatively rare cell population.  
25 Comparing control and *Fgf20*<sup>-/-</sup> prosensory cell mRNA, TRAPseq revealed many genes  
26 previously associated with FGF signaling, as well as genes with functional significance in  
27 cochlea development. Among these genes is *Sall1*, mutations in which cause Townes-Brocks  
28 syndrome, a genetic condition associated with variable features that include sensorineural  
29 hearing loss (Kohlhase et al. 1998; Rossmiller and Pasic 1994).

30

31

## 32 RESULTS

33

## 1 ***Fgf20<sup>Cre</sup>* targets L10a-eGFP expression to the cochlear prosensory domain and Kölliker's** 2 **organ**

3  
4 At embryonic day 14.5 (E14.5), the floor of the cochlear duct can be divided into three sections  
5 (Fig. 1A): 1) prosensory domain (PD), which contains prosensory cells that differentiate into  
6 HCs and SCs of the OC; 2) outer sulcus (OS), epithelium that is lateral (abneural) to the  
7 prosensory domain, which develops into the lesser epithelial ridge (LER), and 3) Kölliker's organ  
8 (KO), epithelium that is medial (neural) to the prosensory domain, which develops into the  
9 greater epithelial ridge (GER). We have previously shown that at E14.5, *Fgf20* is expressed in  
10 the prosensory domain and at postnatal day 1 (P1), the *Fgf20<sup>Cre</sup>* lineage includes the OC and  
11 the GER (Huh et al. 2012, 2015).

12  
13 To evaluate the TRAP technique for our use, we combined the *ROSA<sup>fsTRAP</sup>* and *Fgf20<sup>Cre</sup>* alleles.  
14 The *Fgf20<sup>Cre</sup>* allele was made by targeted insertion of a sequence encoding a GFP-Cre fusion  
15 protein replacing exon 1 of *Fgf20* (Huh et al. 2015). As expected based on prior expression and  
16 lineage tracing experiments, at E14.5, L10a-eGFP fluorescence (green) from *Fgf20<sup>Cre/+</sup>*;  
17 *ROSA<sup>fsTRAP</sup>* cochleae was found in the prosensory domain, Kölliker's organ, the cochlear duct  
18 wall more medial to the Kölliker's organ, and some cells in the spiral ganglion (Fig. 1B). Also, as  
19 expected, at P0, L10a-eGFP in *Fgf20<sup>Cre/+</sup>*; *ROSA<sup>fsTRAP</sup>* cochleae was found in the OC and the  
20 GER (Fig. 1B).

21  
22 Another *Fgf20* null allele, *Fgf20<sup>βgal</sup>*, was made by targeted insertion of a sequence coding β-  
23 Galactosidase replacing exon 1 of *Fgf20* (Huh et al. 2012). We combined the *Fgf20<sup>Cre</sup>* and  
24 *Fgf20<sup>βgal</sup>* alleles to generate *Fgf20<sup>-/-</sup>* mice (*Fgf20<sup>Cre/βgal</sup>*), which maintained the same dosage of  
25 Cre as control mice (*Fgf20<sup>Cre/+</sup>*). Importantly, based on both double fluorescence expression  
26 from the *ROSA<sup>mTmG</sup>* Cre-reporter allele, the *Fgf20<sup>Cre</sup>* lineage (green) did not change in  
27 *Fgf20<sup>Cre/βgal</sup>* cochleae compared to *Fgf20<sup>Cre/+</sup>* (Fig. 1C). Based on these results, we believed that  
28 *Fgf20<sup>Cre/+</sup>*; *ROSA<sup>fsTRAP/+</sup>* and *Fgf20<sup>Cre/βgal</sup>*; *ROSA<sup>fsTRAP/+</sup>* mice will allow us to enrich for prosensory  
29 cell mRNA to examine changes in gene expression in the absence of FGF20 signaling.

## 31 ***Fgf20<sup>Cre</sup>* TRAPseq enriched for prosensory domain mRNA**

32  
33 TRAPseq experiments were performed at E14.5, based on our previous findings that FGF20  
34 signaling is required for prosensory cell differentiation at E13.5-E15.5 (Yang et al. 2019). In the

1 initial experiment, we collected pre-TRAP (pre-IP) and TRAP (post-IP) RNA from  
2 *Fgf20<sup>Cre/+</sup>; ROSA<sup>fsTRAP/+</sup>* cochleae at E14.5 (Fig. 1D). Quantitative reverse transcription PCR  
3 (qRT-PCR) showed enrichment of the prosensory cell marker *Id2* (Jones et al. 2006) and  
4 depletion of the mesenchyme marker *Twist2* (also called *Dermo1*) (Huh et al. 2015), by TRAP  
5 (Fig. 1E).

6  
7 Next, we performed TRAPseq on *Fgf20<sup>+/-</sup>* (*Fgf20<sup>Cre/+</sup>; ROSA<sup>fsTRAP/+</sup>*) control and *Fgf20<sup>-/-</sup>*  
8 (*Fgf20<sup>Cre/βgal</sup>; ROSA<sup>fsTRAP/+</sup>*) E14.5 cochleae. *Fgf20<sup>+/-</sup>* and *Fgf20<sup>-/-</sup>* embryos were generated at a  
9 1:1 ratio. For each litter, cochleae from all control embryos were pooled together for RNA  
10 collection, and likewise for *Fgf20<sup>-/-</sup>* embryos. Each sample represents RNA from pooled tissue  
11 from a minimum of three embryos. In total, 24 libraries were sequenced: 16 TRAP samples (8  
12 *Fgf20<sup>+/-</sup>* and 8 *Fgf20<sup>-/-</sup>*) and 8 pre-TRAP samples (4 *Fgf20<sup>+/-</sup>* and 4 *Fgf20<sup>-/-</sup>*). Pre-TRAP samples  
13 were collected prior to IP, representing whole cochlea RNA, including RNA from mesenchyme  
14 and otic capsule. See Experimental Procedures for details.

15  
16 Principal component analysis (PCA) of the 24 samples showed separation between pre-TRAP  
17 and TRAP RNA samples along PC1 (Fig. 2A). However, there was no separation between  
18 *Fgf20<sup>+/-</sup>* vs. *Fgf20<sup>-/-</sup>* samples along PC1 or PC2. PCA of only the 16 TRAP samples also did not  
19 show separation between *Fgf20<sup>+/-</sup>* vs. *Fgf20<sup>-/-</sup>* samples along the first two PCs (Fig. 2B). To  
20 assess the efficiency of the TRAP technique, differentially expressed gene (DEG) analysis using  
21 DESeq2 (Love et al. 2014) was performed to compare pre-TRAP control samples with TRAP  
22 control samples (same genotype, *Fgf20<sup>Cre/+</sup>; ROSA<sup>fsTRAP/+</sup>*, for both). 3850 DEGs were identified  
23 with adjusted p-value (padj) < 0.01 and Log<sub>2</sub> Fold Change (LFC) < -1 or > 1 (Fig. 2C). Of these,  
24 2017 genes had decreased expression in TRAP samples, compared to pre-TRAP (depleted by  
25 TRAP) and 1833 genes had increased expression in TRAP samples, compared to pre-TRAP  
26 (enriched by TRAP). Among the genes depleted by TRAP were mesenchymal markers *Cd44*  
27 and *Twist2* (Huh et al. 2015; Zhu et al. 2006), vasculature markers *Eln* and *Fbln1* (Cooley et al.  
28 2008; Karnik et al. 2003), and chondrocyte markers *Runx2* and *Matn1* (Fujita et al. 2004; Pei  
29 et al. 2008). This was expected, since otic mesenchyme and capsule were included in the input  
30 tissue but did not express L10a-eGFP. *Bmp4*, *Lmx1a*, and *Gata2*, markers for the outer sulcus  
31 (Lilleväli et al., 2004; Ohyama et al., 2010) were depleted as well. This was also expected, as  
32 the outer sulcus was not captured by TRAP (Fig. 1A, B). Among the genes enriched by TRAP  
33 were prosensory domain markers *Fgf20*, *Atoh1*, *Hey2*, *Sox2*, *Gata3*, and *Id2* (Basch et al. 2011;  
34 Huh et al. 2012; Jones et al. 2006; Kiernan et al. 2005, 9; Luo et al. 2013; Woods et al. 2004),

1 Kölliker's organ markers *Lfng*, *Fgf10*, and *Jag1* (Ohyama et al. 2010), and spiral ganglion  
2 markers *Neurod1* and *Tubb3* (Locher et al. 2014; Puligilla et al. 2010), as expected based on  
3 the *Fgf20<sup>Cre</sup>* lineage. Gene set overlap analysis with gene ontology (GO) on genes depleted by  
4 TRAP showed biological processes terms “angiogenesis” and “endochondral ossification”  
5 among the top terms (Table 1). GO analysis on genes enriched by TRAP showed biological  
6 processes terms “sensory perception of sound”, “axon guidance”, and “auditory receptor cell  
7 stereocilium organization” among the top terms (Table 2). These results strongly suggest that  
8 TRAP enriched for RNA from our target cell population. Pre-TRAP vs. TRAP sequencing  
9 comparison data are presented in Supplemental file S1.

10

### 11 ***Fgf20<sup>Cre</sup>* TRAPseq revealed known FGF target genes during cochlear sensory epithelium** 12 **differentiation**

13

14 DEG analysis on *Fgf20<sup>+/+</sup>* vs. *Fgf20<sup>-/-</sup>* pre-TRAP samples resulted in, as expected, very few  
15 DEGs. In fact, only three genes were found to be significantly changed, based on adjusted p-  
16 value (padj) of < 0.1: *Tectb*, *Calb1*, and *Fgf20*. DEG analysis on *Fgf20<sup>+/+</sup>* vs. *Fgf20<sup>-/-</sup>* TRAP  
17 samples resulted in 47 DEGs with padj < 0.01 and 104 DEGs with padj < 0.1 (Fig. 3A). GO  
18 analysis with the top 362 TRAPseq DEGs (cut-off of padj < 0.5) found among the top 40 terms  
19 “sensory perception of sound,” “sensory organ morphogenesis,” “ear development,” and “inner  
20 ear receptor cell differentiation” (Table 3). Many neuronal and cell cycle biological processes  
21 terms, such as “regulation of neuron differentiation,” “forebrain neuron differentiation,”  
22 “regulation of neural precursor cell proliferation,” “cell division,” and “cell cycle arrest” were also  
23 among the top terms. *Fgf20<sup>+/+</sup>* vs. *Fgf20<sup>-/-</sup>* sequencing comparison data are presented in  
24 Supplemental file S2.

25

26 For DEG analysis, we considered padj < 0.1 to be statistically significant. Confirming the validity  
27 of our TRAPseq results, DEGs with padj < 0.1 include *Fgf20* as well as *Hey1*, *Hey2*, *Etv4*, and  
28 *Etv5* (Table 4), which we have previously shown by RNA in situ hybridization (ISH) are  
29 downregulated in *Fgf20<sup>-/-</sup>* vs. *Fgf20<sup>+/+</sup>* cochleae (Yang et al. 2019). To confirm other genes  
30 identified by TRAPseq, we examined their expression patterns via ISH in *Fgf20<sup>+/+</sup>* (*Fgf20<sup>Cre/+</sup>*)  
31 and *Fgf20<sup>-/-</sup>* (*Fgf20<sup>Cre/βgal</sup>*) E14.5 cochleae. We began with DEGs that have been well-linked to  
32 FGF signaling (Table 4) and were downregulated in *Fgf20<sup>-/-</sup>* cochleae by TRAPseq, such as  
33 *Dusp6*, *Etv1*, *Spry1*, and *Spry4* (Minowada et al. 1999; Münchberg and Steinbeisser 1999;  
34 Willardsen et al. 2014; Yang et al. 2018). By ISH, *Dusp6* (Dual specificity phosphatase 6) was

1 expressed within the prosensory domain in control cochleae, and was almost undetectable in  
2 *Fgf20*<sup>-/-</sup> cochleae (Fig. 3B). *Etv1* (Ets variant 1) was also expressed within the prosensory  
3 domain. Interestingly, while *Etv1* expression was absent in the prosensory domain in *Fgf20*<sup>-/-</sup>  
4 cochleae, it was increased in the outer sulcus (Fig. 3B, arrowhead). *Spry1* (Sprouty homolog 1)  
5 and *Spry4* (Sprouty homolog 4) expressions were found diffusely in the floor of the cochlear  
6 duct, and appeared slightly decreased in *Fgf20*<sup>-/-</sup> cochleae, although it was difficult to tell  
7 definitively by ISH (Fig. 3B).

## 8

### 9 ***Fgf20*<sup>Cre</sup> TRAPseq revealed many genes associated with cochlea development or hearing** 10 **loss**

11

12 Many DEGs from *Fgf20*<sup>+/+</sup> vs. *Fgf20*<sup>-/-</sup> TRAPseq have previously been associated with cochlea  
13 development (Table 5). We validated some interesting DEGs via ISH, including *Tectb*, *Smpx*,  
14 *Epyc*, *Fat3*, and *Heyl* (Fig. 4A). *Tectb* (Tectorin beta) was expressed in the prosensory domain  
15 and Kölliker's organ and was nearly absent in the prosensory domain of *Fgf20*<sup>-/-</sup> cochleae.  
16 Meanwhile, *Tecta* (Tectorin alpha), which also trended towards lower expression per TRAPseq  
17 (padj = 0.22), was not changed based on ISH. *Smpx* (Small muscle protein, X-linked) was lowly  
18 expressed in the prosensory domain and was increased in *Fgf20*<sup>-/-</sup> cochleae. *Epyc* (Epiphygan)  
19 was faintly expressed in the medial cochlear duct wall at this stage and was increased in *Fgf20*<sup>-/-</sup>  
20 cochleae. *Fat3* (FAT atypical cadherin 3) was expressed in the prosensory domain and was  
21 decreased in *Fgf20*<sup>-/-</sup> cochleae. *Heyl* (hairy/enhancer-of-split related with YRPW motif-like) has  
22 not been associated with cochlea development or hearing loss, but belongs in the same family  
23 as *Hey1* and *Hey2*. By ISH, it is not expressed in the cochlea at E14.5, but is upregulated in the  
24 prosensory domain in *Fgf20*<sup>-/-</sup> cochleae.

25

26 TRAPseq also identified a few transcription factors that were depleted by TRAP, but increased  
27 in *Fgf20*<sup>-/-</sup> cochleae, including *Gata2* (GATA binding protein 2), *Meis2* (Meis homeobox 2), and  
28 *Lmx1a* (LIM homeobox transcription factor 1 alpha). Depletion by TRAP suggests that they are  
29 not highly expressed in the prosensory domain or Kölliker's organ. By ISH, all three genes were  
30 expressed in the outer sulcus and/or roof of the cochlear duct (Fig. 4B). However, ISH did not  
31 appear to be sensitive enough to detect differences in the expression of any of these genes.  
32 *Bmp4* (Bone morphogenetic protein 4) is another gene depleted by TRAP, but not significantly  
33 changed in *Fgf20*<sup>-/-</sup> cochleae (padj = 0.38). By ISH *Bmp4* was expressed in the outer sulcus and  
34 did not show any changes in *Fgf20*<sup>-/-</sup> cochleae (Fig. 4B).

1

## 2 ***Fgf20<sup>Cre</sup>* TRAPseq revealed decreased expression of cell cycle regulators**

3

4 GO analysis on *Fgf20<sup>+/-</sup>* vs. *Fgf20<sup>-/-</sup>* TRAPseq DEGs showed that the cell cycle may be affected  
5 by the loss of FGF20, with the terms “cell division” and “cell cycle arrest” among the top terms  
6 (Table 3). This was confirmed by known and predicted protein-protein interaction (PPI) network  
7 identification via the STRING database (Snel et al. 2000; Szklarczyk et al. 2019) with the top  
8 192 DEGs, representing those with  $\text{padj} < 0.3$ . By far the largest PPI network identified  
9 consisted of cell cycle regulators (Fig. 5A). The list of top DEGs indeed showed many genes  
10 involved in cell cycle regulation, all of which were decreased in expression in *Fgf20<sup>-/-</sup>* cochleae  
11 (Table 6).

12

13 Although we have not found that *Fgf20* regulates cell cycle progression by itself, *Fgf20* does  
14 interact with *Fgf9* and *Sox2* to regulate prosensory progenitor and Kölliker’s organ proliferation,  
15 respectively (Huh et al. 2015; Yang et al. 2019). We hypothesize, therefore, that the expression  
16 changes in cell cycle regulators may reflect these functions of *Fgf20*. To rule out the possibility  
17 that cell cycle regulation contributes to the differentiation and patterning defect found in *Fgf20<sup>-/-</sup>*  
18 cochleae, we examined the largest node of the PPI network, *Cdc20* (Cell division cycle 20).  
19 *Cdc20* is a coactivator of the anaphase-promoting complex (APC), the cell cycle-regulated  
20 ubiquitin ligase. Interestingly, Cdc20-APC is required for presynaptic axon differentiation in  
21 postmitotic neurons in the cerebellum (Yang et al. 2009).

22

23 To examine how decreased expression of *Cdc20* may contribute to the *Fgf20<sup>-/-</sup>* phenotype, we  
24 combined *Fgf20<sup>Cre</sup>* with *Cdc20<sup>flox</sup>* to conditionally delete *Cdc20* from the *Fgf20<sup>Cre</sup>* lineage  
25 (Manchado et al. 2010). *Fgf20<sup>Cre/+</sup>;Cdc20<sup>flox/flox</sup>* (*Cdc20<sup>CKO</sup>*) cochleae (length:  $3.48 \pm 0.75$  mm)  
26 were shorter and more tightly coiled than *Fgf20<sup>Cre/+</sup>;Cdc20<sup>flox/+</sup>* (*Cdc20<sup>CHet</sup>*) cochleae (length:  
27  $4.86 \pm 0.18$  mm) (Fig. 5B). Importantly, HCs (labeled by phalloidin, green) in *Cdc20<sup>CKO</sup>* cochleae  
28 exhibited the normal pattern of one row of IHCs separated from three rows of OHCs by pillar  
29 cells (inner pillar cells labeled by P75<sup>NTR</sup>, red) (Fig. 5C). Interestingly, 4 of 5 *Cdc20<sup>CKO</sup>* cochleae  
30 examined had 4 or more rows of OHCs at the apical tip (Fig. 5C), which may be the result of a  
31 defect in convergent extension. Upon quantification, total number of IHCs and OHCs were  
32 decreased in *Cdc20<sup>CKO</sup>* (IHC:  $339 \pm 59$ ; OHC:  $1295 \pm 108$ ) relative to *Cdc20<sup>CHet</sup>* (IHC:  $580 \pm 9$ ;  
33 OHC:  $1916 \pm 59$ ) cochleae (Fig. 5D); however, this can likely be attributed to the shorter length  
34 of the cochlea.



1

## 2 ***Sall1-ΔZn<sup>2-10</sup>* mutant cochleae exhibit an outer hair cell phenotype**

3

4 *Sall1* (Sal-like 1) and *Sall3* (Sal-like 3), members of a family of transcription factors, are  
5 expressed in the cochlear duct throughout development (Nishinakamura et al. 2001; Ott et al.  
6 1996, 2001; Parrish et al. 2004). Both were identified by TRAPseq as decreased in *Fgf20<sup>-/-</sup>*  
7 cochleae (Table 5). ISH showed that both *Sall1* and *Sall3* were expressed in the prosensory  
8 domain and were decreased in *Fgf20<sup>-/-</sup>* cochleae (Fig. 6A). Interestingly, *Sall2* (Sal-like 2),  
9 another member of the same family, trended towards lower expression according to TRAPseq  
10 (padj = 0.26). By ISH, *Sall2* was also expressed in the prosensory domain, but was not  
11 noticeably decreased in *Fgf20<sup>-/-</sup>* cochleae (Fig. 6A). *Sall4*, the fourth member of the *Sall* family,  
12 was filtered out from TRAPseq analysis due to insufficiently low read counts.

13

14 Importantly, *SALL1* has been linked to Townes-Brocks syndrome (TBS) in humans, which  
15 causes sensorineural hearing loss, among other developmental defects (Kohlhase et al. 1998).  
16 Mutations in one copy of *SALL1* is responsible for TBS, although *SALL1* haploinsufficiency may  
17 not be the sole causative factor, as *Sall1*-null mice do not recapitulate the human TBS  
18 phenotypes (Nishinakamura et al. 2001). Instead, mice expressing one copy of a *Sall1* allele  
19 with mutations known to cause TBS, *Sall1-ΔZn<sup>2-10</sup>* (*Sall1<sup>Δ</sup>*), mimic TBS defects, including  
20 hearing loss (Kiefer et al. 2003). This mutation results in a truncated protein encoding the N-  
21 terminus of *Sall1*, which has been shown to mediate transcriptional repression (Kiefer et al.  
22 2002). Like wildtype *Sall1*, the truncated *Sall1<sup>Δ</sup>* protein can bind all members of the *Sall* family  
23 (Kiefer et al. 2003), and its expression alone in transgenic mice leads to derepression of *Sall*-  
24 regulated genes resulting in TBS-like phenotypes (Kiefer et al. 2008). These results suggest  
25 that *Sall1<sup>Δ</sup>* may act as a dominant negative and interfere with the transcription-repressor activity  
26 of all *Sall* proteins.

27

28 We hypothesized that the dominant negative effects of *Sall<sup>Δ</sup>* may recapture the decrease in  
29 *Sall1* and *Sall3* expression in *Fgf20<sup>-/-</sup>* cochleae. To see if mice heterozygous for this mutation  
30 (*Sall1<sup>Δ/+</sup>*) may exhibit cochlea development phenotypes similar to *Fgf20<sup>-/-</sup>* mice, we examined  
31 *Sall1<sup>Δ/+</sup>* cochleae at E18.5. While the overall HC patterning appeared unchanged in *Sall1<sup>Δ/+</sup>*  
32 cochleae compared to *Sall1<sup>+/+</sup>* (Fig. 6B), there was a small but statistically significant decrease  
33 in the number of OHCs in *Sall1<sup>Δ/+</sup>* cochleae (2321 ± 79), compared to *Sall1<sup>+/+</sup>* (2486 ± 81) (Fig.  
34 6C). The number of IHCs (*Sall1<sup>+/+</sup>*: 711 ± 21; *Sall1<sup>Δ/+</sup>*: 707 ± 30 mm) appeared unchanged,

1 suggesting that OHCs may be more sensitive to the *Sall1*<sup>Δ</sup> mutation. Cochlea length (*Sall1*<sup>+/+</sup>:  
2 6.06 ± 0.25 mm; *Sall1*<sup>Δ/+</sup>: 5.73 ± 0.53 mm including a possible outlier at 4.65 mm) also appeared  
3 relatively unchanged.

4  
5 Most embryos homozygous for the *Sall1*<sup>ΔΔ</sup> mutation (*Sall1*<sup>ΔΔ</sup>) die by E16.5 (Kiefer et al. 2003).  
6 However, we were able to obtain two *Sall1*<sup>ΔΔ</sup> embryos that survived to E18.5. The cochleae of  
7 these embryos showed a further reduction of the number of OHCs compared to *Sall1*<sup>Δ/+</sup> (1898  
8 and 1922 in the two samples, a 23-24% decrease compared to *Sall1*<sup>+/+</sup> cochleae). *Sall1*<sup>ΔΔ</sup>  
9 embryos also showed a decrease in the number of IHCs (612 and 668 in the two samples, a 9-  
10 14% decrease compared to *Sall1*<sup>+/+</sup> cochleae) and in cochlea length (4.07 mm and 4.94 mm in  
11 the two samples, a 18-32% decrease compared to *Sall1*<sup>+/+</sup> cochleae) (Fig. 6C). The decrease in  
12 the number of OHCs is more severe than the decrease in number of IHCs, again suggesting  
13 that OHCs may be more sensitive to the *Sall1*<sup>Δ</sup> mutation.

14  
15 In addition, the HCs in *Sall1*<sup>ΔΔ</sup> cochleae appeared less mature than those found in comparative  
16 regions of *Sall1*<sup>+/+</sup> and *Sall1*<sup>Δ/+</sup> cochleae, based on F-actin organization in phalloidin stained  
17 samples (Fig. 6B). This is most apparent in the mid-apical turns, where stereocilia bundles  
18 appeared relatively well-formed in *Sall1*<sup>+/+</sup> and *Sall1*<sup>Δ/+</sup> cochleae (Fig. 6B, inset). In *Sall1*<sup>ΔΔ</sup>  
19 cochleae, however, the stereocilia in this region appeared much more immature and  
20 disorganized (arrows in Fig. 6B inset), resembling those found in the less mature apical tip (hair  
21 cell differentiation and maturation occur in a base-to-apex gradient (Basch et al. 2016),  
22 therefore, more apical hair cells are less mature). In the apical tip, the F-actin networks at the  
23 HC cortex in *Sall1*<sup>ΔΔ</sup> cochleae appeared less dense than those found in *Sall1*<sup>+/+</sup> and *Sall1*<sup>Δ/+</sup>  
24 cochleae, as indicated by weaker phalloidin labeling (Fig. 6B, inset).

25  
26 Interestingly, many ectopic IHCs were found throughout the length of *Sall1*<sup>ΔΔ</sup> cochleae,  
27 especially towards the apex (Fig. 6B, arrowheads). Quantification of these ectopic IHCs showed  
28 a statistically significant increase in *Sall1*<sup>ΔΔ</sup> (30 and 66) compared to *Sall1*<sup>+/+</sup> (7 ± 4) and *Sall1*<sup>Δ/+</sup>  
29 (11 ± 6) cochleae (Fig. 6C). These ectopic IHCs suggest a patterning defect in *Sall1*<sup>ΔΔ</sup>  
30 cochleae.

## 31 32 33 **DISCUSSION**

34

1 We have adapted the TRAP technique to study a relatively small population of difficult-to-isolate  
2 cells: cochlear prosensory cells. TRAP using *Fgf20<sup>Cre</sup>* combined with *ROSA<sup>tsTRAP</sup>* effectively  
3 enriched for translating mRNA from the *Fgf20<sup>Cre</sup>* lineage at E14.5. We believe the pre-TRAP vs.  
4 TRAP DEG analysis provides a useful dataset for identifying genes enriched in the prosensory  
5 domain, Kölliker's organ, and spiral ganglion of the developing cochlea.

6  
7 TRAPseq comparing *Fgf20<sup>+/-</sup>* and *Fgf20<sup>-/-</sup>* E14.5 cochlea samples showed decreased  
8 expression of known FGF20 signaling targets in the cochlea at this stage: *Etv4*, *Etv5*, *Hey1*, and  
9 *Hey2*. It also showed decreased expression of other FGF signaling targets, such as *Dusp6* and  
10 *Etv1*, further confirming the validity our technique. Just as importantly, TRAPseq DEGs did not  
11 include genes that we have previously shown are not downstream of FGF20, but that have been  
12 shown to be downstream of FGFR1: *Cdkn1b* and *Sox2* (Table 5) (Huh et al. 2015; Yang et al.  
13 2019). Interestingly, however, *Lockd*, a non-coding RNA near the *Cdkn1b* locus and co-  
14 expressed with *Cdkn1b* (Paralkar et al. 2016), was significantly decreased in *Fgf20<sup>-/-</sup>* cochleae  
15 (Table 5). The expression of a few other genes previously shown to be downstream of FGFR1  
16 during cochlea development, such as *Fgf10*, *Hes5*, and *Ntf3* (Ono et al. 2014; Pirvola et al.  
17 2002), were also not significantly changed.

18  
19 As with any large data experiment, false positives and negatives are expected. Here, we used a  
20 lenient false discovery rate of 0.1 to evaluate *Fgf20<sup>+/-</sup>* and *Fgf20<sup>-/-</sup>* TRAPseq results to reduce  
21 the number of false negatives at the cost of increasing false positives. While we were able to  
22 confirm many TRAPseq DEGs via ISH, as well as confirm the expression of several non-  
23 significantly changed genes as unchanged via ISH, there were discrepancies between  
24 TRAPseq and ISH results. Besides false positivity, another possible and interesting explanation  
25 for the discrepancies is that TRAPseq specifically identifies differences in translating mRNA.  
26 Such differences may not always be reflected in the whole mRNA population detected by ISH,  
27 due to posttranscriptional regulation. Therefore, TRAPseq data may be a more accurate  
28 representation of protein expression.

29  
30 Another caveat is that the *Fgf20<sup>Cre</sup>*-TRAP enrichment process is not perfect, due to limitations of  
31 the technique and the inclusion of Kölliker's organ and spiral ganglion cells in the *Fgf20<sup>Cre</sup>*  
32 lineage. RNA from these sources dilute the mRNA from the target prosensory cell population,  
33 reducing the power of TRAPseq in detecting changes within this population.

34

## 1 TRAPseq identified DEGs previously associated with cochlea development or hearing

2  
3 A few other DEGs identified by TRAPseq comparison of *Fgf20*<sup>+/+</sup> and *Fgf20*<sup>-/-</sup> cochleae have  
4 known roles in cochlea development (Table 5). Altered expression of these genes, therefore,  
5 may contribute to the *Fgf20*<sup>-/-</sup> phenotype. Importantly, we do not know what proportion of these  
6 DEGs are directly regulated by FGF20, and what proportion may be indirectly regulated or are  
7 markers of dysregulated differentiation. Here, we highlight some of these DEGs.

8  
9 *Fat3*, encoding a mammalian homolog of the *Drosophila* cell adhesion molecule Fat, is required  
10 for the normal patterning of OHCs, along with *Fat4* (Saburi et al. 2012). *Fat3*-null cochleae  
11 exhibits a small loss of OHCs from the base of the cochlea and a slight gain of OHCs in the mid-  
12 apex. We hypothesize that the decreased expression of *Fat3* may contribute to the OHC  
13 patterning defect in *Fgf20*<sup>-/-</sup> cochleae.

14  
15 *Cpxm2* (Carboxypeptidase X 2) is one of the three genes on chromosome 7 deleted in the head  
16 bobber mouse line, which exhibits deafness and vestibular defects (Buniello et al. 2013; Somma  
17 et al. 2012). However, how *Cpxm2* deletion contributes to deafness in these mice has not been  
18 elucidated.

19  
20 *Tectb* is expressed in the prosensory domain (Rau et al. 1999) and encodes a major  
21 glycoprotein in the tectorial membrane required for normal hearing (Russell et al. 2007).  
22 Interestingly, *Tecta*, another gene encoding a glycoprotein in the tectorial membrane, trended  
23 towards lower expression (not statistically significantly) and did not show decreased expression  
24 by ISH. The composition of the tectorial membrane in *Fgf20*<sup>-/-</sup> cochleae has not been studied.

25  
26 *Thrb* (Thyroid hormone receptor beta) is expressed in the OC, GER, spiral ligament, and spiral  
27 ganglion in the neonatal cochlea. *Thrb*-mutant mice (both null and mutants with disrupted  
28 thyroid hormone binding) have severe hearing loss attributed to disruption of postnatal  
29 morphogenesis of the tectorial membrane (Forrest et al. 1996; Griffith et al. 2002; Kaukua et al.  
30 2014; Ng et al. 2015; Sharlin et al. 2011). Interestingly, *Thrb* trended towards increased  
31 expression per TRAPseq (padj = 0.13).

32  
33 *Myh14* (myosin, heavy polypeptide 14) is one of the genes encoding Myosin II. It is expressed in  
34 both developing HCs and SCs in the prenatal organ of Corti. Myosin II is required for patterning

1 and convergent extension in the cochlea (Yamamoto et al. 2009). A convergence and extension  
2 defect may contribute to the shortened length of *Fgf20*<sup>-/-</sup> cochleae. *Myh14* trended towards  
3 decreased expression per TRAPseq (padj = 0.23).

4  
5 *Smpx*, previously shown to be expressed in HCs (Yoon et al. 2011), is associated with heritable  
6 progressive hearing loss (Abdelfatah et al. 2013; Huebner et al. 2011; Schraders et al. 2011).  
7 However, *Smpx*-null mice have not been shown to have a hearing defect or much of an overt  
8 developmental phenotype (Palmer et al. 2001). Given that *Smpx* is expressed in HCs, its  
9 increased expression in *Fgf20*<sup>-/-</sup> cochleae may reflect the premature onset of HC differentiation  
10 in these mice.

11  
12 *Epyc*, encoding a proteoglycan expressed in mature nonsensory regions of the cochlear duct, is  
13 required for normal hearing (Hanada et al. 2017). Its faint expression at E14.5 in the medial  
14 cochlear duct wall of control cochlea and increased expression in *Fgf20*<sup>-/-</sup> cochleae may also  
15 reflect the premature onset of differentiation, although it has not been shown that the Kölliker's  
16 organ undergoes premature differentiation in *Fgf20*<sup>-/-</sup> cochleae.

17

## 18 **TRAPseq identified DEGs with unknown functions in cochlea development**

19

20 Most of the DEGs identified by *Fgf20*<sup>+/-</sup> and *Fgf20*<sup>-/-</sup> TRAPseq have no known roles in cochlea  
21 development. However, some of these are related to genes with known roles in cochlea  
22 development, suggesting possible redundancy. Here, we highlight some of the most interesting  
23 ones.

24

25 *Dusp6* is a known downstream target of FGF signaling (Dickinson and Keyse 2006) and is a  
26 downstream target of FGF20 signaling in the olfactory system (Yang et al. 2018). Mice  
27 heterozygous for a *Dusp6*-null allele exhibit hearing loss, attributed to malformed otic capsule  
28 and ossicles (Li et al. 2007). While *Dusp6* is known to be expressed in the prosensory domain  
29 and the organ of Corti (Urness et al. 2008), which we confirm, its role in the development of  
30 these structures has not been investigated.

31

32 *Etv4* (Ets variant 4) and *Etv5* (Ets variant 5) have been shown to be downstream of  
33 FGF20/FGFR1 signaling in the developing cochlea (Hayashi et al. 2008; Yang et al. 2019).  
34 However, *Etv1*, the third member of the PEA3 group of Ets transcription factors, has not been

1 associated with cochlea development. We show here that *Etv1* expression is decreased in the  
2 prosensory domain in *Fgf20*<sup>-/-</sup> cochleae, while its expression is increased in the outer sulcus.  
3 This is potentially a significant pattern change, as the *Fgf20*<sup>-/-</sup> phenotype is more severe in the  
4 outer compartment. Investigating whether this increase in expression in the outer sulcus  
5 contributes to the *Fgf20*<sup>-/-</sup> phenotype will be addressed in future experiments.

6  
7 *Hey1* and *Hey2* (hairy/enhancer-of-split related with YRPW motif 1 and 2) have been shown to  
8 be downstream of FGF20 signaling in the developing cochlea and are required to prevent  
9 premature HC differentiation (Benito-Gonzalez and Doetzlhofer 2014; Yang et al. 2019).  
10 TRAPseq identified that a third member of the Hes-related gene family, *Heyl*, is significantly  
11 increased in *Fgf20*<sup>-/-</sup> cochleae at E14.5. Based on this observation, we hypothesize *Heyl* may be  
12 the compensating for the loss of *Hey1* and *Hey2*.

13  
14 Other DEGs with unclear functional significance but that are known to be expressed in the  
15 cochlea include (Table 5):

- 16 • *Pou3f3* (POU domain, class 3, transcription factor 3) is expressed in SCs and  
17 mesenchymal cells in the cochlea (Mutai et al. 2009). Based on ISH from the Eurexpress  
18 atlas, it is also expressed in the cochlear duct floor at E14.5 (Diez-Roux et al., 2011,  
19 <http://www.eurexpress.org> euxassay\_019559). However, analysis of the *Pou3f3*-null  
20 mouse cochlea did not reveal any apparent developmental defects (Mutai et al. 2009).  
21 Despite this, auditory and vestibular impairments have been reported in a *Pou3f3*  
22 (*Pou3f3*<sup>L423P</sup>) mutant mouse line (Kumar et al. 2016). Interestingly, *Pantr1* (*Pou3f3*  
23 adjacent noncoding transcript 1), a lncRNC that shares a bidirectional promoter with  
24 *Pou3f3* (Goff et al. 2015), was also decreased in *Fgf20*<sup>-/-</sup> cochleae per TRAPseq,  
25 suggesting disrupted activity at the promoter. In addition, *Rorb* (RAR-related orphan  
26 receptor beta), found to be increased in *Fgf20*<sup>-/-</sup> cochleae by TRAPseq, has an  
27 antagonistic interaction with *Pou3f3* during cell fate specification in the developing  
28 neocortex (Oishi et al. 2016).
- 29 • *Calb1* (Calindin 1): expressed in mature HCs (Waldhaus et al. 2015). Upregulation may  
30 represent premature onset of HC differentiation in *Fgf20*<sup>-/-</sup> cochleae.
- 31 • *Crym* (Crystallin, mu): a thyroid hormone binding protein, highly expressed in  
32 nonsensory regions of the cochlea in adult rats (Usami et al. 2008).
- 33 • *Shc4* (SHC family, member 4): an adaptor protein expressed in the cochlear duct floor at  
34 E14.5 and E15.5 (Hawley et al. 2011).

- 1 • *Car13* (Carbonic anhydrase 13): expressed in nonsensory regions of the cochlea and  
2 the mesenchyme at E15.5 and neonatal stages (Wu et al. 2013)
- 3 • *Tac1* (Tachykinin 1): reported to be expressed in the cochlear epithelium during  
4 development (Radde-Gallwitz et al. 2004).
- 5 • *Lum* (Lumican): expressed in the otic capsule, some mesenchyme, and nonsensory  
6 regions of the cochlear duct (Ficker et al. 2004).
- 7 • *Nes* (Nestin): expressed in the spiral ganglion and parts of the prosensory domain at  
8 E14.5 and E15.5, as well as in mature SCs (Chow et al. 2016, 2015).

9

### 10 **Nonsensory cell markers are upregulated in *Fgf20*<sup>-/-</sup> cochleae**

11

12 *Fgf20*<sup>+/-</sup> vs. *Fgf20*<sup>-/-</sup> TRAPseq also identified a few transcription factors expressed in the outer  
13 sulcus and other nonsensory cochlear epithelium: *Gata2*, *Meis2*, and *Lmx1a* (Haugas et al.  
14 2010; Koo et al. 2009; Lilleväli et al. 2004; Mann et al. 2017; Nichols et al. 2008; Sánchez-  
15 Guardado et al. 2011). As expected, all of these genes were depleted by TRAP, as they are not  
16 expressed in the prosensory domain or Kölliker's organ. Interestingly, they are all increased in  
17 *Fgf20*<sup>-/-</sup> cochleae per TRAPseq, suggesting that undifferentiated progenitors in *Fgf20*<sup>-/-</sup> cochlea  
18 may have adopted a nonsensory identity. Two other outer sulcus/nonsensory epithelial markers,  
19 *Hmx2* and *Bmp4* (Morsli et al. 1998; Wang et al. 2001), also trended toward increased  
20 expression in *Fgf20*<sup>-/-</sup> cochleae, albeit not significantly (padj = 0.11 and 0.38, respectively).  
21 *Bmp4* is interesting because of its importance in patterning the outer sulcus, prosensory  
22 domain, and Kölliker's organ (Ohyama et al. 2010).

23

24 Examining the expression of these genes by ISH did not reveal noticeable changes between  
25 *Fgf20*<sup>+/-</sup> and *Fgf20*<sup>-/-</sup> cochleae. We hypothesize that because TRAP depletes for the outer sulcus  
26 and roof of the cochlea, TRAPseq is highly sensitive to the expression of markers of these  
27 regions in the prosensory domain. Therefore, TRAPseq may be much more sensitive than ISH  
28 to detect small changes in the expression of genes such as *Gata2*, *Meis2*, and *Lmx1a*, which  
29 may represent a shift in the boundary between the prosensory domain and outer sulcus.

30

31

### 32 **Cell cycle regulators are downregulated in *Fgf20*<sup>-/-</sup> cochleae**

33

1 TRAPseq revealed many differentially expressed cell cycle regulators. We have shown before  
2 that *Fgf20* by itself does not appear to regulate the cell cycle or proliferation in the developing  
3 cochlea. However, *Fgf20* is redundant with *Fgf9* in indirectly regulating prosensory progenitor  
4 proliferation at earlier developmental stages (E11.5-E12.5) (Huh et al. 2015) and is redundant  
5 with *Sox2* in regulating Kölliker's organ proliferation at E14.5 (Yang et al. 2019). Therefore, we  
6 believe the finding of differentially expressed cell cycle regulators may be reflective of the  
7 redundant and stage-specific functions of *Fgf20* in regulating proliferation. As expected, while  
8 *Cdc20* conditional-null cochleae are short, they do not exhibit the HC differentiation or  
9 patterning defect found in *Fgf20*<sup>-/-</sup> cochleae. We conclude that the ~10-20% decrease in length  
10 of *Fgf20*<sup>-/-</sup> cochleae may be attributable to decreased expression of these cell cycle regulators in  
11 sensory progenitors. It is also possible that *Fgf20* has a previously unidentified role in regulating  
12 prosensory cell cycle exit, and decreased expression of these cell cycle regulator genes are  
13 reflective of premature cell cycle exit.

14

### 15 ***Fgf20* regulates *Sall1*, a gene implicated in human sensorineural hearing loss**

16

17 We found that members of the *Sall* family, *Sall1*, *Sall2*, and *Sall3* are expressed in the  
18 prosensory domain at E14.5. *Sall1*, *Sall3*, and potentially *Sall2* showed decreased expression  
19 by TRAPseq and ISH in *Fgf20*<sup>-/-</sup> cochleae, suggesting that they may be regulated by FGF20  
20 signaling. Notably, in the kidney, *Sall1* expression has been shown to be regulated by FGF  
21 signaling (Poladia et al. 2006). As mentioned previously, mutations in *SALL1* causes Townes-  
22 Brocks syndrome (TBS) in humans, an autosomal dominant disorder with variable presentation  
23 of phenotypes including sensorineural hearing loss (Kohlhase et al. 1998). *Sall1*<sup>Δ/+</sup> mice mimic  
24 TBS, including hearing loss (Kiefer et al. 2003). However, whether cochlea development is  
25 affected in these mice has not been studied. We decided to examine *Sall1*<sup>Δ</sup> cochleae due to  
26 evidence suggesting that the truncated *Sall1*<sup>Δ</sup> protein acts as a dominant negative on other  
27 members of the *Sall* family (Kiefer et al. 2003, 2008).

28

29 We found that *Sall1*<sup>Δ/+</sup> had normal HC patterning, but exhibited a small decrease in the total  
30 number of OHCs. This is reminiscent of the *Fgf20*<sup>-/-</sup> and *Fgf20*;*Sox2* compound mutant  
31 phenotypes, in which OHCs are the most sensitive to the loss of FGF20 (Huh et al. 2012; Yang  
32 et al. 2019). We are not sure, however, how much this reduction in the number of OHCs  
33 contributes to the hearing defect found in these mice.

34



1 *Sall1<sup>ΔΔ</sup>* cochleae exhibited a more severe defect than *Sall1<sup>Δ/+</sup>* cochleae, including shorter  
2 cochlea length, a small decrease in the total number of IHCs, and a large decrease in the total  
3 number of OHCs. We do not know whether the decrease in HC number is solely attributable to  
4 the shorter cochlea length. It is possible that both the HC and cochlea length phenotypes are  
5 the result of a defect in prosensory progenitor proliferation, such as that found in *Fgf20;Fgf9*  
6 double mutant mice (Huh et al. 2015), or the result of a defect in prosensory specification, such  
7 as that found in *Sox2* mutant mice (Kiernan et al. 2005). It is also possible that the decrease in  
8 HC number is due to a defect in differentiation, similar to that found in *Fgf20<sup>-/-</sup>* cochleae.

9  
10 Interestingly, *Sall1<sup>ΔΔ</sup>* cochleae also appeared to exhibit a delay in the apical progression of HC  
11 maturation, similar to *Fgf20<sup>-/-</sup>* cochleae (Huh et al. 2012). Furthermore, *Sall1<sup>ΔΔ</sup>* cochleae  
12 contained numerous ectopic IHCs, found outside of the normal row of IHCs, a patterning defect  
13 that again is reminiscent of *Fgf20<sup>-/-</sup>* and *Fgf20;Sox2* compound mutant phenotypes (Huh et al.  
14 2012; Yang et al. 2019). The interaction between *Fgf20*, *Sox2*, and *Sall1/3* is a topic to explore  
15 in future studies. Based on all of these results, we conclude that the decreased expression of  
16 *Sall1* and *Sall3* may contribute to the OHC and patterning defects found in *Fgf20<sup>-/-</sup>* cochleae.

## 17 18 **Conclusions**

19  
20 The *Fgf20<sup>-/-</sup>* cochlea phenotype includes loss of two-thirds of OHCs, abnormal patterning of the  
21 remaining HCs, shorter cochlea length, premature onset of differentiation, and delayed apical  
22 progression of differentiation and maturation. Here, we did not identify one single gene that can  
23 account for the majority of the *Fgf20<sup>-/-</sup>* phenotype. However, we identified many FGF20-  
24 regulated genes that may contribute to parts of the phenotype. For instance, *Hey1*, *Hey2*, and  
25 possibly *Heyl* may account for the premature onset of differentiation phenotype; *Sall1*, *Sall3*,  
26 and *Fat3* may account for the OHC differentiation, patterning, and delay in maturation  
27 phenotypes; and cell cycle regulators such as *Cdc20* may account for the progenitor  
28 proliferation phenotypes in *Fgf20;Fgf9* and *Fgf20;Sox2* compound mutants. We conclude that  
29 the dramatic *Fgf20<sup>-/-</sup>* phenotype in which gaps in the sensory epithelium separate islands of HCs  
30 and SCs may not be explained by a straightforward lateral compartment differentiation defect.  
31 Rather, the phenotype may be the result of disruptions to a combination of FGF20-regulated  
32 processes, including prosensory progenitor proliferation, differentiation, maturation, and timing  
33 of differentiation. Given the complexity of organ of Corti development, we hypothesize that small  
34 disturbances to such processes can lead to much larger defects in overall development.

1  
2  
3  
4  
5  
6  
7  
8  
9  
10  
11  
12  
13  
14  
15  
16  
17  
18  
19  
20  
21  
22  
23  
24  
25  
26  
27  
28  
29  
30  
31  
32

## EXPERIMENTAL PROCEDURES

### Mice

All studies performed were in accordance with the Institutional Animal Care and Use Committee at Washington University in St. Louis (protocol #20190110 and #20170258).

Mice were group housed with littermates, in breeding pairs, or in a breeding harem (2 females to 1 male), with food and water provided ad libitum. Mice were of mixed sexes and maintained on a mixed C57BL/6J x 129X1/SvJ genetic background, except *Sall1<sup>A</sup>* mice, which were maintained on an ICR genetic background. The following mouse lines were used:

- *Fgf20<sup>Cre</sup>*: knockin allele containing a sequence encoding a GFP-Cre fusion protein replacing exon 1 of *Fgf20*, resulting in a null mutation (Huh et al. 2015).
- *Fgf20<sup>βgal</sup>*: knockin allele containing a sequence encoding β-galactosidase (βgal) replacing exon 1 of *Fgf20*, resulting in a null mutation (Huh et al. 2012).
- *ROSA<sup>tsTRAP</sup>*: knockin allele containing a loxP-Stop-loxP sequence followed by a sequence encoding L10a-eGFP, targeted to the ubiquitously expressed ROSA26 locus. Upon Cre-mediated recombination, the polysomal protein L10a-eGFP is expressed (Zhou et al. 2013).
- *ROSA<sup>mTmG</sup>*: knockin allele containing a sequence encoding a membrane-localized tdTomato (mT) flanked by loxP sequences, followed by a sequence encoding a membrane-localized eGFP (mG), targeted to the ubiquitously expressed ROSA26 locus. In the absence of Cre-mediated recombination, mT is expressed; upon Cre-mediated recombination, mG is alternatively expressed (Muzumdar et al. 2007).
- *Sall1-ΔZn<sup>2-10</sup> (Sall1<sup>A</sup>)*: mutant allele expressing a truncated Sall1 protein designed to mimic a mutation that causes Townes-Brocks syndrome (Kiefer et al. 2003).
- *Cdc20<sup>fllox</sup>*: allele containing loxP sequences flanking exon 2 of *Cdc20*; upon Cre-mediated recombination, results in a null allele (Manchado et al. 2010).

## 1 **Translating ribosome affinity purification (TRAP)**

2

3 Affinity matrix preparation: for each immunoprecipitation (IP): 30  $\mu$ l of Streptavidin MyOne T1  
4 Dynabeads (Invitrogen, 65602) were washed in 1x PBS using an end-over-end tube rotator and  
5 a magnet, and resuspended in 88  $\mu$ l of 1x PBS and conjugated to 12  $\mu$ l of 1  $\mu$ g/ $\mu$ l biotinylated  
6 protein L (Pierce 29997) in PBS for 35 min at room temperature (RT) with gentle end-over-end  
7 mixing on a tube rotator. Conjugated beads were then washed with 1x PBS + 3% IgG and  
8 protease-free BSA (Jackson ImmunoResearch, 001-000-162) x5, followed by three washes in  
9 low-salt buffer (20 mM HEPES KOH, pH 7.4, 10 mM MgCl<sub>2</sub>, 150 mM KCl, 1% NP-40 [Sigma  
10 I8896-50ML], 0.5 mM DTT [Sigma, 646563], 100  $\mu$ g/ml cycloheximide [Sigma C4859-1ML]).  
11 Conjugated beads were then resuspended in low-salt buffer and mixed with 50  $\mu$ g each of anti-  
12 GFP antibodies Htz-GFP-19C8 and Htz-GFP-19F7 (Memorial Sloan-Kettering Monoclonal  
13 Antibody Facility) overnight at 4°C with gentle end-over-end mixing to make the affinity matrix.  
14 Immediately before IP, the affinity matrix was washed in low-salt buffer x3.

15

16 Sample collection: E14.5 embryos were harvested, on ice, from a mating producing a 1:1 ratio  
17 of *Fgf20*<sup>Cre/+</sup>; *ROSA*<sup>fsTRAP/+</sup> and *Fgf20*<sup>Cre/ $\beta$ gal</sup>; *ROSA*<sup>fsTRAP/+</sup> progeny. Embryos were staged based  
18 on vaginal plug (E0.5 at noon on the day plug is found) and on interdigital webbing. Embryos  
19 with too much or too little interdigital webbing were not harvested. Embryos were genotyped by  
20 LacZ staining to look for *Fgf20* <sup>$\beta$ gal</sup> expression in back skin hair follicles (back skin from embryos  
21 were incubated in 2 mM MgCl<sub>2</sub>, 5 mM K3, 5 mM K4, 0.02% NP-40, and 1 mg/ml X-gal in N,N-  
22 dimethylformamide in 1x PBS for 30 min at 37°C, protected from light). Ventral otocysts from the  
23 embryos were dissected out in dissection buffer (1x HBSS, 2.5 mM HEPES-KOH, pH 7.4, 35  
24 mM glucose, 4 mM NaHCO<sub>3</sub>, 100  $\mu$ g/ml cycloheximide), separated from the dorsal otocyst  
25 (vestibule) without removal of the otic capsule, and pooled together by genotype. Each sample  
26 contained pooled ventral otocysts from 3-7 embryos. Pooled ventral otocysts were  
27 homogenized in lysis buffer (20 mM HEPES KOH, pH 7.4, 150 mM KCl, 10 mM MgCl<sub>2</sub>, EDTA-  
28 free protease inhibitors [Roche, 04693159001], 0.5 mM DTT, 100  $\mu$ g/ml cycloheximide, 10  $\mu$ l/ml  
29 rRNasin [Promega N2515], 10  $\mu$ l/ml Supersasin [Applied Biosystems, AM2696]) using a pre-  
30 chilled Kontes homogenizer (Kontes, 885512-0020). To remove the nuclear fraction,  
31 homogenized samples were centrifuged for 10 min at 2000 g, 4°C. The supernatant (S2) was  
32 mixed with 1/8 volume of 10% NP-40 and 300 mM DHPC (reconstituted in lysis buffer; Avanti  
33 Polar Lipids 850306P) and incubated for 10 min on ice. To remove the mitochondrial fraction,  
34 samples were then centrifuged for 15 min at 20,000 g, 4°C. 60  $\mu$ l of the supernatant (S20) was

1 saved as the pre-IP (pre-TRAP) control. The pre-TRAP S20 samples were incubated at 4°C  
2 until the RNA purification step, which was done in conjunction with TRAP samples. The rest of  
3 the S20 was used for IP.

4  
5 Immunoprecipitation: S20 was mixed with the affinity matrix for 24 hours at 4°C with end-over-  
6 end mixing. The mixture (TRAP sample) was washed in high-salt buffer (20 mM HEPES KOH,  
7 pH 7.4, 10 mM MgCl<sub>2</sub>, 350 mM KCl, 1% NP-40, 0.5 mM DTT, 100 µg/ml cycloheximide, 1 µl/ml  
8 rRNasin, 1 µl/ml Supersasin) for 2 min at RT, x4.

9  
10 RNA purification: the Arcturus Picopure RNA Isolation Kit (Thermo Fisher, 12204-01) was used  
11 to isolate RNA from pre-TRAP and TRAP samples according to manufacturer's instructions.  
12 RNA was eluted in 13 µl of elution buffer. Ventral otocysts from 3-7 embryos ranged between 4-  
13 20 ng of TRAP RNA. RNA samples were stored at -80°C until use in downstream applications.

#### 14 15 **Quantitative RT-PCR**

16  
17 cDNA was synthesized from pre-TRAP and TRAP RNA using the iScript Select cDNA Synthesis  
18 Kit (Bio-Rad, #170-8841). mRNA expression was measured using TaqMan Fast Advanced  
19 Master Mix (Life Technologies, 4444557) and TaqMan assay probes for *Twist2* and *Id2*. *Gapdh*  
20 was used as normalization control. Results were analyzed by the  $\Delta\Delta$ CT method (normalized to  
21 *Gapdh*, then normalized to pre-TRAP). Each sample represents TRAP RNA from one litter.

#### 22 23 **cDNA library preparation and sequencing**

24  
25 cDNA library preparation and sequencing were done at the Genome Technology Access Center  
26 (GTAC) at Washington University (gtac.wustl.edu). RNA samples were analyzed on an Agilent  
27 2100 Bioanalyzer; all sequenced RNA samples had an RNA Integrity Number (RIN) of  $\geq 8.8$ .  
28 Clontech SMARTer kit was used for cDNA library preparation and amplification. The TRAPseq  
29 results presented are from two sequencing experiments. cDNA library preparation was done  
30 independently in the two experiments. In both experiments, 8 TRAP samples (4 *Fgf20*<sup>+/+</sup> and 4  
31 *Fgf20*<sup>-/-</sup>) and 4 pre-TRAP samples (2 *Fgf20*<sup>+/+</sup> and 2 *Fgf20*<sup>-/-</sup>) were sequenced on one Illumina  
32 HiSeq 3000 lane, with single reads, 1 x 50 bps. 24 samples were sequenced in total between  
33 the two experiments (12 samples multiplexed per lane per experiment). Sequencing produced  
34 between 22 and 38 million reads per sample.

1  
2  
3  
4  
5  
6  
7  
8  
9  
10  
11  
12  
13  
14  
15  
16  
17  
18  
19  
20  
21  
22  
23  
24  
25  
26  
27  
28  
29  
30  
31  
32  
33  
34

## Bioinformatic analysis

Basecalling was performed with Illumina RealTimeAnalysis software. The resulting bcl files were demultiplexed with Illumina's bclToFastq2. Both steps were performed by GTAC.

Alignment: Reads were mapped to GRCm38.p5 (Ensembl, GCA\_000001635.7) (Howe et al. 2020) using STAR (Dobin et al. 2013), with the GRCm38.91 annotation file (Ensembl). Default parameters were used, except for the following: multi-sample 2-pass, with default settings on first pass and sjdbFileChrStartEnd (for novel splice junctions), ScoreMinOverLread=0.4, MatchNminOverLread=0.4, MismatchNmax=5 on second pass (these parameters gave the most consistent unmapped reads % across all 24 TRAPseq samples). 95-99.5% of reads were mapped per sample.

Counting and DEG analysis: Analyses were performed in R using packages from Bioconductor (bioconductor.org). BAM files were indexed and sorted using Rsamtools (Morgan et al. 2018). Gene models were defined using the GRCm38.91 annotation file (Ensembl) with GenomicFeatures (Lawrence et al. 2013). Reads were counted using the SummarizeOverlaps method (mode = Union) from the package GenomicAlignments (Lawrence et al. 2013). Genes were filtered out from downstream analysis if less than 8 of 24 samples had 25 or more reads. PC analysis showed separation between the 8 pre-TRAP samples and 16 TRAP samples along PC1, and also separation between sequencing experiment 1 and experiment 2 along PC2. Removal of Unwanted Variation from RNA-Seq Data (RUVSeq) (Risso et al., 2014) was used to correct for this batch effect (RUVs function, k = 1). DESeq2 (Love et al. 2014, 2) with RUVs correction factors was used for DEG analysis, with alpha = 0.1 and Benjamini-Hochberg multiple-comparisons correction.

Pathway analysis: gene ontology (GO) analysis was done using the Bioconductor package topGO (Alexa and Rahnenfuhrer 2016) with the following parameters: nodeSize = 10; ontology = biological processes (BP); algorithm = elim; statistic = fisher's exact test. Protein-protein interaction network analysis was performed using STRING version 11.0 (Snel et al. 2000; Szklarczyk et al. 2019) with the following parameters: active interaction sources include textmining, experiments, databases, co-expression, neighborhood, gene fusion, co-occurrence; minimum required interaction score = high confidence (0.700).

1

## 2 **Sample preparation and sectioning for histology and in situ hybridization**

3

4 For whole mount cochleae, inner ears were dissected out of P0 pups and fixed in 4% PFA in  
5 PBS overnight at 4°C with gentle agitation. Samples were then washed x3 in PBS. Cochleae  
6 were dissected away from the vestibule, otic capsule, and periotic mesenchyme with Dumont  
7 #55 Forceps (RS-5010, Roboz, Gaithersburg, MD). The roof of the cochlear duct was opened  
8 up by dissecting away the stria vascularis and Reissner's membrane; tectorial membrane was  
9 removed to expose hair and supporting cells.

10

11 For sectioning, heads from E14.5 embryos were fixed in 4% PFA in PBS overnight at 4°C with  
12 gentle agitation. Samples were then washed x3 in PBS and cryoprotected in 15% sucrose in  
13 PBS overnight and then in 30% sucrose in PBS overnight. Samples were embedded in Tissue-  
14 Tek O.C.T. compound (4583, VWR International, Radnor, PA) and frozen on dry ice. Serial  
15 horizontal sections through base of the head were cut at 12 µm with a cryostat, dried at room  
16 temperature, and stored at -80°C until use.

17

## 18 **RNA in situ hybridization**

19

20 Probe preparation: mouse cDNA plasmids containing the following inserts were used to make  
21 RNA in situ probes, and were cut and transcribed with the indicated restriction enzyme (New  
22 England Biolabs) and RNA polymerase (New England Biolabs): *Dusp6* (412 bp, Acc65I, T7, gift  
23 of Suzanne Mansour), *Etv1* (2500 bp, SpeI, T7, gift of Sung-Ho Huh), *Spry1* (1500 bp, EcoRI,  
24 T7, gift of George Minowada), *Spry4* (900 bp, EcoRI, T7, gift of George Minowada), *Tectb* (2746  
25 bp, EcoRI, T7, gift of Doris Wu), *Tecta* (4382 bp, NotI, T7, gift of Doris Wu), *Epyc* (1522 bp,  
26 EcoRI, T7, Image clone 4037028), *Fat3* (945 bp, EcoRI, T7, gift of Lisa Goodrich), *Heyl* (1895,  
27 BamHI, T7, Image clone 40142873) *Sall1* (450 bp, HindIII, T7), *Sall2* (431 bp, EcoRI, T7), *Sall3*  
28 (551 bp, XbaI, T3), *Gata2* (700 bp, BamHI, T3, gift of Doris Wu), *Meis2* (~5000 bp, EcoRI, T3,  
29 gift of Yingzi Yang), *Lmx1a* (600 bp, SphI, Sp6, gift of Doris Wu), *Bmp4* (1560 bp, Accl, T7). The  
30 *Smpx* probe was made from PCR product (gift of Jinwoong Bok) and transcribed with T7.

31

32 Frozen section in situ hybridization: frozen slides were warmed for 20 min at room temperature  
33 and then 5 min at 50°C on a slide warmer. Sections were fixed in 4% PFA in PBS for 20 min at  
34 room temperature, washed x2 in PBS and treated with pre-warmed 10 µg/ml Proteinase K

1 (03115828001, Sigma-Aldrich, St. Louis, MO) in PBS for 7 min at 37°C. Sections were then  
2 fixed in 4% PFA in PBS for 15 min at room temperature, washed x2 in PBS, acetylated in 0.25%  
3 acetic anhydride in 0.1M Triethanolamine, pH 8.0, for 10 min, and washed again in PBS.  
4 Sections were then placed in pre-warmed hybridization buffer (50% formamide, 5x SSC buffer,  
5 5 mM EDTA, 50 µg/ml yeast tRNA) for 3 h at 60°C in humidified chamber for prehybridization.  
6 Sections were then hybridized in 10 µg/ml probe/hybridization buffer overnight (12-16 h) at  
7 60°C. The next day, sections were washed in 1x SSC for 10 min at 60°C, followed by 1.5x SSC  
8 for 10 min at 60°C, 2x SSC for 20 min at 37°C x2, and 0.2x SSC for 30 min at 60°C x2. Sections  
9 were then washed in KTBT (0.1 M Tris, pH 7.5, 0.15 M NaCl, 5 mM KCl, 0.1% Triton X-100) at  
10 room temperature and blocked in KTBT + 20% sheep serum + 2% Blocking Reagent  
11 (11096176001, Sigma-Aldrich, St. Louis, MO) for 4 h. Blocking Reagent was dissolved in 100  
12 mM Maleic acid, 150 mM NaCl, pH 7.5. Sections were then incubated in sheep anti-  
13 Digoxigenin-AP, Fab fragments (1:1000, 11093274910, Sigma-Aldrich, St. Louis, MO) in KTBT  
14 + 20% sheep serum + 2% Blocking Reagent overnight at 4°C. Sections were then washed x3 in  
15 KTBT for 30 min at room temperature, and then washed x2 in NTMT (0.1 M Tris, pH 9.5, 0.1 M  
16 NaCl, 50 mM MgCl<sub>2</sub>, 0.1% Tween 20) for 15 min. Sections were next incubated in NTMT +  
17 1:200 NBT/BCIP Stock Solution (11681451001, Sigma-Aldrich, St. Louis, MO) in the dark at  
18 room temperature until color appeared. Sections were then washed in PBS, post-fixed in 4%  
19 PFA in PBS for 15 min and washed x2 in PBS. Finally, sections were dehydrated in 30% and  
20 then 70% methanol, 5 min each, followed by 100% methanol for 15 min. Sections were then  
21 rehydrated in 70% and 30% methanol and then PBS, 5 min each, and mounted in 95% glycerol.

22

## 23 **Immunofluorescence**

24

25 Whole mount: cochleae were incubated in PBS + 0.5% Tween-20 (PBSTw) for 1 h to  
26 permeabilize. Cochleae were then blocked using PBSTw + 5% donkey serum for 1 h and then  
27 incubated in PBSTw + 1% donkey serum with the primary antibody overnight at 4°C. Cochleae  
28 were then washed x3 in PBS and incubated in PBS + 1% Tween-20 with the secondary  
29 antibody. After wash in PBS x3, cochleae were mounted in 95% glycerol with the sensory  
30 epithelium facing up.

31

32 Frozen slides were warmed for 30 min at room temperature and washed in PBS before  
33 incubating in PBS + 0.5% Triton X-100 (PBST) for 1 h to permeabilize the tissue. Sections were  
34 then blocked using in PBST + 5% donkey serum for 1 h and then incubated in PBST + 1%

1 donkey serum with the primary antibody overnight at 4°C in a humidified chamber. Sections  
2 were then washed x3 in PBS and incubated in PBS + 1% Triton X-100 with the secondary  
3 antibody. After wash in PBS x3, slides were mounted in VectaShield antifade mounting medium  
4 with DAPI (H-1200, Vector Labs, Burlingame, CA).

5  
6 The following compounds and antibodies were used:

- 7 • Alexa Fluor 488-conjugated Phalloidin (1:50, A12379, Invitrogen, Carlsbad, CA)
- 8 • Rabbit anti-P75NTR (1:300, AB1554, EMD Millipore, Burlington, MA)
- 9 • Alexa Fluor 555 goat anti-rabbit IgG (1:500, A21428, Invitrogen, Carlsbad, CA)

## 10 11 **Imaging**

12  
13 Light microscopy: slides were scanned using a Hamamatsu NanoZoomer slide scanning system  
14 with a 20x objective. Images were then processed with the NanoZoomer Digital Pathology  
15 (NDP.view2) software. 3D specimens were imaged using an Olympus SZXZ110 stereo  
16 microscope equipped with an Olympus DP70 camera.

17  
18 Fluorescent microscopy was done using a Zeiss LSM 700 confocal or Zeiss Axio Imager Z1 with  
19 Apotome 2, with z-stack step-size determined based on objective lens type (10x or 20x), as  
20 recommended by the ZEN software (around 1 µm). Fluorescent images shown are maximum  
21 projections. Images were processed with ImageJ ([imagej.nih.gov](http://imagej.nih.gov)).

## 22 23 **Image analysis and quantification**

24  
25 Measurements and cell quantification (using the Cell Counter plugin by Kurt De Vos) were done  
26 using ImageJ and Fiji (Schindelin et al. 2012). Total cochlear duct length was defined as the  
27 length from the very base of the cochlea to the very tip of the apex, along the tunnel of Corti,  
28 measured on whole-mount cochlea. Hair cells and stereocilia bundles were identified via  
29 Phalloidin, which binds to F-actin (Avinash et al. 1993). Inner pillar cells were labeled via  
30 P75NTR (Mueller et al. 2002). Inner hair cells (IHCs) were differentiated from outer hair cells  
31 (OHCs) based on their neural/abneural location, respectively, relative to P75NTR-expressing  
32 inner pillar cells. For total cell counts, IHCs and OHCs were counted along the entire length of  
33 the cochlea.

34



## 1 **Statistical analysis and plotting**

2  
3 All figures were made in Canvas X (ACD systems). RNA sequencing data analysis and plotting,  
4 were performed using R (r-project.org) in R studio (rstudio.com) PCA graphs were made using  
5 the plotPCA function from the package RUVSeq; volcano plots were made using modified code  
6 from Stephen Turner (gist.github.com/stephenturner). See Bioinformatic analysis section for  
7 more details on RNA sequencing data analysis. All other data analysis and plotting were  
8 performed using Python (python.org) in Jupyter Notebook (jupyter.org) with the following  
9 libraries: Pandas (pandas.pydata.org), Seaborn (seaborn.pydata.org), NumPy (numpy.org) and  
10 SciPy (scipy.org). Plotting was done using the Matplotlib library (matplotlib.org). Statistics (t-test,  
11 one-way ANOVA, and two-way ANOVA) were performed using the SciPy module Stats; Tukey's  
12 HSD was performed using the Statsmodels package (statsmodels.org). All comparisons of two  
13 means were performed using two-tailed, unpaired Student's t-test. For comparisons of more  
14 than two means, one-way ANOVA was used. For significant ANOVA results at  $\alpha = 0.05$ , Tukey's  
15 HSD was performed for post-hoc pair-wise analysis. In all cases,  $p < 0.05$  was considered  
16 statistically significant. All statistical details can be found in the figures and figure legends. In all  
17 cases, each sample (each data point in graphs) represents one animal. Based on similar  
18 previous studies, a sample size of 3-5 was determined to be appropriate. Error bars represent  
19 mean  $\pm$  standard deviation. For qualitative comparisons (comparing expression via  
20 immunofluorescence or RNA in situ hybridization), at least three samples were examined per  
21 genotype. All images shown are representative. No data were excluded from analysis.

22  
23

## 24 **ACKNOWLEDGEMENTS**

25  
26 We thank J. Dougherty and his laboratory for their help with the TRAP technique, and B. Zhang  
27 (Department of Developmental Biology), and T. Sinnwell and M. Heinz (Genome Technology  
28 Access Center in the Department of Genetics) for their help with RNA sequencing and analysis.  
29 We also thank Cole Ferguson for supplying us with *Cdc20<sup>flox</sup>* mice. This work was funded by the  
30 Department of Developmental Biology at Washington University, NIH/National Institute on  
31 Deafness and Other Communication Disorders grant DC017042 (DMO), the Washington  
32 University Institute of Clinical and Translational Sciences which is, in part, supported by the  
33 NIH/National Center for Advancing Translational Sciences, CTSA grant UL1TR002345 (JIT471  
34 to DMO), March of Dimes grant 6-FY13-127 (MR), and the Rare Disease Foundation/BC

1 Children's Hospital Foundation. GTAC is partially supported by NCI Cancer Center Support  
2 Grant P30 CA91842 to the Siteman Cancer Center and by ICTS/CTSA Grant UL1TR000448  
3 from the National Center for Research Resources (NCRR). HOPE Center Alafi Neuroimaging  
4 Laboratory is supported by NCRR grant 1S10RR027552, the Auditory and Vestibular  
5 Microscopy and Digital Imaging Core is supported by NIH grant P30 DC004665. The authors  
6 have no conflicts of interest to disclose.

## 8 **AUTHOR CONTRIBUTIONS**

9  
10 Conceptualization, L.M.Y., M.R., and D.M.O.; Methodology, L.M.Y. and D.M.O.; Formal  
11 Analysis, L.M.Y.; Investigation: L.M.Y. and L.S.; Resources: M.R. and D.M.O.; Writing – Original  
12 Draft: L.M.Y; Writing – Review & Editing: L.M.Y., M.R., and D.M.O.; Supervision: D.M.O.;  
13 Funding Acquisition: M.R. and D.M.O.

## 16 **REFERENCES**

- 17  
18 Abdelfatah N, Merner N, Houston J, Benteau T, Griffin A, Doucette L, Stockley T, Lauzon JL,  
19 Young T-L. 2013. A Novel Deletion in SMPX Causes a Rare form of X-Linked  
20 Progressive Hearing Loss in Two Families Due to a Founder Effect. *Hum Mutat* **34**: 66–  
21 69.
- 22 Alexa A, Rahnenfuhrer J. 2016. topGO: Enrichment Analysis for Gene Ontology.
- 23 Allen SB, Goldman J. 2019. Syndromic Sensorineural Hearing Loss (SSHL). In *StatPearls*,  
24 StatPearls Publishing, Treasure Island (FL)  
25 <http://www.ncbi.nlm.nih.gov/books/NBK526088/> (Accessed April 8, 2020).
- 26 Avinash GB, Nuttall AL, Raphael Y. 1993. 3-D analysis of F-actin in stereocilia of cochlear hair  
27 cells after loud noise exposure. *Hear Res* **67**: 139–146.
- 28 Basch ML, Brown RM, Jen H-I, Groves AK. 2016. Where hearing starts: the development of the  
29 mammalian cochlea. *J Anat* **228**: 233–254.

- 1 Basch ML, Ohyama T, Segil N, Groves AK. 2011. Canonical Notch Signaling Is Not Necessary  
2 for Prosensory Induction in the Mouse Cochlea: Insights from a Conditional Mutant of  
3 RBPj. *J Neurosci* **31**: 8046–8058.
- 4 Benito-Gonzalez A, Doetzlhofer A. 2014. Hey1 and Hey2 Control the Spatial and Temporal  
5 Pattern of Mammalian Auditory Hair Cell Differentiation Downstream of Hedgehog  
6 Signaling. *J Neurosci* **34**: 12865–12876.
- 7 Bowl MR, Brown SDM. 2018. Genetic landscape of auditory dysfunction. *Hum Mol Genet* **27**:  
8 R130–R135.
- 9 Buniello A, Hardisty-Hughes RE, Pass JC, Bober E, Smith RJ, Steel KP. 2013. Headbobber: a  
10 combined morphogenetic and cochleosaccular mouse model to study 10qter deletions in  
11 human deafness. *PLoS One* **8**: e56274.
- 12 Chow C, Trivedi P, Pyle M, Matulle J, Fettiplace R, Gubbels SP. 2016. Evaluation of Nestin  
13 Expression in the Developing and Adult Mouse Inner Ear. *Stem Cells Dev.*
- 14 Chow CL, Guo W, Trivedi P, Zhao X, Gubbels SP. 2015. Characterization of a unique cell  
15 population marked by transgene expression in the adult cochlea of nestin-  
16 CreER(T2)/tdTomato-reporter mice. *J Comp Neurol* **523**: 1474–1487.
- 17 Cooley MA, Kern CB, Fresco VM, Wessels A, Thompson RP, McQuinn TC, Twal WO,  
18 Mjaatvedt CH, Drake CJ, Argraves WS. 2008. Fibulin-1 is required for morphogenesis of  
19 neural crest-derived structures. *Dev Biol* **319**: 336–345.
- 20 Corwin JT, Warchol ME. 1991. Auditory hair cells: structure, function, development, and  
21 regeneration. *Annu Rev Neurosci* **14**: 301–333.
- 22 Dickinson RJ, Keyse SM. 2006. Diverse physiological functions for dual-specificity MAP kinase  
23 phosphatases. *J Cell Sci* **119**: 4607–4615.
- 24 Diez-Roux G, Banfi S, Sultan M, Geffers L, Anand S, Rozado D, Magen A, Canidio E, Pagani  
25 M, Peluso I, et al. 2011. A High-Resolution Anatomical Atlas of the Transcriptome in the  
26 Mouse Embryo. *PLoS Biol* **9**: e1000582.
- 27 Dobin A, Davis CA, Schlesinger F, Drenkow J, Zaleski C, Jha S, Batut P, Chaisson M, Gingeras  
28 TR. 2013. STAR: ultrafast universal RNA-seq aligner. *Bioinformatics* **29**: 15–21.

- 1 Edgar R, Domrachev M, Lash AE. 2002. Gene Expression Omnibus: NCBI gene expression  
2 and hybridization array data repository. *Nucleic Acids Res* **30**: 207–210.
- 3 Ficker M, Powles N, Warr N, Pirvola U, Maconochie M. 2004. Analysis of genes from inner ear  
4 developmental-stage cDNA subtraction reveals molecular regionalization of the otic  
5 capsule. *Dev Biol* **268**: 7–23.
- 6 Forrest D, Erway LC, Ng L, Altschuler R, Curran T. 1996. Thyroid hormone receptor beta is  
7 essential for development of auditory function. *Nat Genet* **13**: 354–357.
- 8 Fujita T, Azuma Y, Fukuyama R, Hattori Y, Yoshida C, Koida M, Ogita K, Komori T. 2004.  
9 Runx2 induces osteoblast and chondrocyte differentiation and enhances their migration  
10 by coupling with PI3K-Akt signaling. *J Cell Biol* **166**: 85–95.
- 11 Goff LA, Groff AF, Sauvageau M, Trayer-Gibson Z, Sanchez-Gomez DB, Morse M, Martin RD,  
12 Elcavage LE, Liapis SC, Gonzalez-Celeiro M, et al. 2015. Spatiotemporal expression  
13 and transcriptional perturbations by long noncoding RNAs in the mouse brain. *Proc Natl*  
14 *Acad Sci U S A* **112**: 6855–6862.
- 15 Griffith AJ, Szymko YM, Kaneshige M, Quiñónez RE, Kaneshige K, Heintz KA, Mastroianni MA,  
16 Kelley MW, Cheng S. 2002. Knock-in mouse model for resistance to thyroid hormone  
17 (RTH): an RTH mutation in the thyroid hormone receptor beta gene disrupts cochlear  
18 morphogenesis. *J Assoc Res Otolaryngol JARO* **3**: 279–288.
- 19 Hanada Y, Nakamura Y, Ishida Y, Takimoto Y, Taniguchi M, Ozono Y, Koyama Y, Morihana T,  
20 Imai T, Ota Y, et al. 2017. Epiphycan is specifically expressed in cochlear supporting  
21 cells and is necessary for normal hearing. *Biochem Biophys Res Commun* **492**: 379–  
22 385.
- 23 Haugas M, Lilleväli K, Hakanen J, Salminen M. 2010. Gata2 is required for the development of  
24 inner ear semicircular ducts and the surrounding perilymphatic space. *Dev Dyn* **239**:  
25 2452–2469.
- 26 Hawley SP, Wills MKB, Rabalski AJ, Bendall AJ, Jones N. 2011. Expression patterns of ShcD  
27 and Shc family adaptor proteins during mouse embryonic development. *Dev Dyn* **240**:  
28 221–231.

- 1 Hayashi T, Ray CA, Bermingham-McDonogh O. 2008. Fgf20 Is Required for Sensory Epithelial  
2 Specification in the Developing Cochlea. *J Neurosci* **28**: 5991–5999.
- 3 Heiman M, Schaefer A, Gong S, Peterson JD, Day M, Ramsey KE, Suárez-Fariñas M, Schwarz  
4 C, Stephan DA, Surmeier DJ, et al. 2008. A translational profiling approach for the  
5 molecular characterization of CNS cell types. *Cell* **135**: 738–748.
- 6 Howe KL, Contreras-Moreira B, De Silva N, Maslen G, Akanni W, Allen J, Alvarez-Jarreta J,  
7 Barba M, Bolser DM, Cambell L, et al. 2020. Ensembl Genomes 2020-enabling non-  
8 vertebrate genomic research. *Nucleic Acids Res* **48**: D689–D695.
- 9 Huebner AK, Gandia M, Frommolt P, Maak A, Wicklein EM, Thiele H, Altmüller J, Wagner F,  
10 Viñuela A, Aguirre LA, et al. 2011. Nonsense mutations in SMPX, encoding a protein  
11 responsive to physical force, result in X-chromosomal hearing loss. *Am J Hum Genet* **88**:  
12 621–627.
- 13 Huh S-H, Jones J, Warchol ME, Ornitz DM. 2012. Differentiation of the Lateral Compartment of  
14 the Cochlea Requires a Temporally Restricted FGF20 Signal ed. A. Groves. *PLOS Biol*  
15 **10**: e1001231.
- 16 Huh S-H, Warchol ME, Ornitz DM. 2015. Cochlear progenitor number is controlled through  
17 mesenchymal FGF receptor signaling. *eLife* **4**: e05921.
- 18 Jones JM, Montcouquiol M, Dabdoub A, Woods C, Kelley MW. 2006. Inhibitors of differentiation  
19 and DNA binding (Ids) regulate Math1 and hair cell formation during the development of  
20 the organ of Corti. *J Neurosci Off J Soc Neurosci* **26**: 550–558.
- 21 Karnik SK, Brooke BS, Bayes-Genis A, Sorensen L, Wythe JD, Schwartz RS, Keating MT, Li  
22 DY. 2003. A critical role for elastin signaling in vascular morphogenesis and disease.  
23 *Development* **130**: 411–423.
- 24 Kaukua N, Shahidi MK, Konstantinidou C, Dyachuk V, Kaucka M, Furlan A, An Z, Wang L,  
25 Hultman I, Ährlund-Richter L, et al. 2014. Glial origin of mesenchymal stem cells in a  
26 tooth model system. *Nature* **513**: 551–554.
- 27 Kiefer SM, McDill BW, Yang J, Rauchman M. 2002. Murine Sall1 represses transcription by  
28 recruiting a histone deacetylase complex. *J Biol Chem* **277**: 14869–14876.

- 1 Kiefer SM, Ohlemiller KK, Yang J, McDill BW, Kohlhase J, Rauchman M. 2003. Expression of a  
2 truncated Sall1 transcriptional repressor is responsible for Townes–Brocks syndrome  
3 birth defects. *Hum Mol Genet* **12**: 2221–2227.
- 4 Kiefer SM, Robbins L, Barina A, Zhang Z, Rauchman M. 2008. SALL1 truncated protein  
5 expression in Townes-Brocks syndrome leads to ectopic expression of downstream  
6 genes. *Hum Mutat* **29**: 1133–1140.
- 7 Kiernan AE, Pelling AL, Leung KKH, Tang ASP, Bell DM, Tease C, Lovell-Badge R, Steel KP,  
8 Cheah KSE. 2005. Sox2 is required for sensory organ development in the mammalian  
9 inner ear. *Nature* **434**: 1031–1035.
- 10 Kohlhase J, Wischermann A, Reichenbach H, Froster U, Engel W. 1998. Mutations in the  
11 SALL1 putative transcription factor gene cause Townes-Brocks syndrome. *Nat Genet*  
12 **18**: 81–83.
- 13 Koo SK, Hill JK, Hwang CH, Lin ZS, Millen KJ, Wu DK. 2009. Lmx1a maintains proper  
14 neurogenic, sensory, and non-sensory domains in the mammalian inner ear. *Dev Biol*  
15 **333**: 14–25.
- 16 Kumar S, Rathkolb B, Kemter E, Sabrautzki S, Michel D, Adler T, Becker L, Beckers J, Busch  
17 DH, Garrett L, et al. 2016. Generation and Standardized, Systemic Phenotypic Analysis  
18 of Pou3f3L423P Mutant Mice. *PLOS ONE* **11**: e0150472.
- 19 Lawrence M, Huber W, Pagès H, Aboyoun P, Carlson M, Gentleman R, Morgan MT, Carey VJ.  
20 2013. Software for Computing and Annotating Genomic Ranges. *PLOS Comput Biol* **9**:  
21 e1003118.
- 22 Li C, Scott DA, Hatch E, Tian X, Mansour SL. 2007. Dusp6 (Mkp3) is a negative feedback  
23 regulator of FGF-stimulated ERK signaling during mouse development. *Development*  
24 **134**: 167–176.
- 25 Lilleväli K, Matilainen T, Karis A, Salminen M. 2004. Partially overlapping expression of Gata2  
26 and Gata3 during inner ear development. *Dev Dyn* **231**: 775–781.

- 1 Locher H, Groot JCMJ de, Iperen L van, Huisman MA, Frijns JHM, Lopes SMC de S. 2014.  
2 Distribution and Development of Peripheral Glial Cells in the Human Fetal Cochlea.  
3 *PLOS ONE* **9**: e88066.
- 4 Love MI, Huber W, Anders S. 2014. Moderated estimation of fold change and dispersion for  
5 RNA-seq data with DESeq2. *Genome Biol* **15**: 550.
- 6 Luo X, Deng M, Xie X, Huang L, Wang H, Jiang L, Liang G, Hu F, Tieu R, Chen R, et al. 2013.  
7 GATA3 controls the specification of prosensory domain and neuronal survival in the  
8 mouse cochlea. *Hum Mol Genet* **22**: 3609–3623.
- 9 Manchado E, Guillaumot M, de Cárcer G, Eguren M, Trickey M, García-Higuera I, Moreno S,  
10 Yamano H, Cañamero M, Malumbres M. 2010. Targeting mitotic exit leads to tumor  
11 regression in vivo: Modulation by Cdk1, Mastl, and the PP2A/B55 $\alpha$ , $\delta$  phosphatase.  
12 *Cancer Cell* **18**: 641–654.
- 13 Mann ZF, Gálvez H, Pedreno D, Chen Z, Chrysostomou E, Žak M, Kang M, Camden E, Daudet  
14 N. 2017. Shaping of inner ear sensory organs through antagonistic interactions between  
15 Notch signalling and Lmx1a. *eLife* **6**: e33323.
- 16 Minowada G, Jarvis LA, Chi CL, Neubuser A, Sun X, Hacoheh N, Krasnow MA, Martin GR.  
17 1999. Vertebrate Sprouty genes are induced by FGF signaling and can cause  
18 chondrodysplasia when overexpressed. *Development* **126**: 4465–4475.
- 19 Morgan M, Pagès H, Obenchain V, Hayden N. 2018. Rsamtools: Binary alignment (BAM),  
20 FASTA, variant call (BCF), and tabix file import.
- 21 Morsli H, Choo D, Ryan A, Johnson R, Wu DK. 1998. Development of the mouse inner ear and  
22 origin of its sensory organs. *J Neurosci* **18**: 3327–3335.
- 23 Mueller KL, Jacques BE, Kelley MW. 2002. Fibroblast Growth Factor Signaling Regulates Pillar  
24 Cell Development in the Organ of Corti. *J Neurosci* **22**: 9368–9377.
- 25 Münchberg SR, Steinbeisser H. 1999. The Xenopus Ets transcription factor XER81 is a target of  
26 the FGF signaling pathway. *Mech Dev* **80**: 53–65.

- 1 Mutai H, Nagashima R, Sugitani Y, Noda T, Fujii M, Matsunaga T. 2009. Expression of  
2 Pou3f3/Brn-1 and its genomic methylation in developing auditory epithelium. *Dev*  
3 *Neurobiol* **69**: 913–930.
- 4 Muzumdar MD, Tasic B, Miyamichi K, Li L, Luo L. 2007. A global double-fluorescent Cre  
5 reporter mouse. *Genesis* **45**: 593–605.
- 6 Ng L, Cordas E, Wu X, Vella KR, Hollenberg AN, Forrest D. 2015. Age-related hearing loss and  
7 degeneration of cochlear hair cells in mice lacking thyroid hormone receptor  $\beta$ 1.  
8 *Endocrinology* en20151468.
- 9 Nichols DH, Pauley S, Jahan I, Beisel KW, Millen KJ, Fritzsche B. 2008. Lmx1a is required for  
10 segregation of sensory epithelia and normal ear histogenesis and morphogenesis. *Cell*  
11 *Tissue Res* **334**: 339–358.
- 12 Nishinakamura R, Matsumoto Y, Nakao K, Nakamura K, Sato A, Copeland NG, Gilbert DJ,  
13 Jenkins NA, Scully S, Lacey DL, et al. 2001. Murine homolog of SALL1 is essential for  
14 ureteric bud invasion in kidney development. *Development* **128**: 3105–3115.
- 15 Ohyama T, Basch ML, Mishina Y, Lyons KM, Segil N, Groves AK. 2010. BMP Signaling Is  
16 Necessary for Patterning the Sensory and Nonsensory Regions of the Developing  
17 Mammalian Cochlea. *J Neurosci* **30**: 15044–15051.
- 18 Oishi K, Aramaki M, Nakajima K. 2016. Mutually repressive interaction between Brn1/2 and  
19 Rorb contributes to the establishment of neocortical layer 2/3 and layer 4. *Proc Natl*  
20 *Acad Sci U S A* **113**: 3371–3376.
- 21 Ono K, Kita T, Sato S, O'Neill P, Mak S-S, Paschaki M, Ito M, Gotoh N, Kawakami K, Sasai Y,  
22 et al. 2014. FGFR1-Frs2/3 Signalling Maintains Sensory Progenitors during Inner Ear  
23 Hair Cell Formation ed. K.S.E. Cheah. *PLOS Genet* **10**: e1004118.
- 24 Ott T, Kaestner KH, Monaghan AP, Schütz G. 1996. The mouse homolog of the region specific  
25 homeotic gene spalt of Drosophila is expressed in the developing nervous system and in  
26 mesoderm-derived structures. *Mech Dev* **56**: 117–128.



- 1 Ott T, Parrish M, Bond K, Schwaeger-Nickolenko A, Monaghan AP. 2001. A new member of the  
2 spalt like zinc finger protein family, Msal-3, is expressed in the CNS and sites of  
3 epithelial/mesenchymal interaction. *Mech Dev* **101**: 203–207.
- 4 Palmer S, Groves N, Schindeler A, Yeoh T, Biben C, Wang C-C, Sparrow DB, Barnett L,  
5 Jenkins NA, Copeland NG, et al. 2001. The Small Muscle-Specific Protein Csl Modifies  
6 Cell Shape and Promotes Myocyte Fusion in an Insulin-like Growth Factor 1–Dependent  
7 Manner. *J Cell Biol* **153**: 985–998.
- 8 Paralkar VR, Taborda CC, Huang P, Yao Y, Kossenkov AV, Prasad R, Luan J, Davies JOJ,  
9 Hughes JR, Hardison RC, et al. 2016. Unlinking an lncRNA from Its Associated cis  
10 Element. *Mol Cell* **62**: 104–110.
- 11 Parrish M, Ott T, Lance-Jones C, Schuetz G, Schwaeger-Nickolenko A, Monaghan AP. 2004.  
12 Loss of the Sall3 Gene Leads to Palate Deficiency, Abnormalities in Cranial Nerves, and  
13 Perinatal Lethality. *Mol Cell Biol* **24**: 7102–7112.
- 14 Pei M, Luo J, Chen Q. 2008. Enhancing and maintaining chondrogenesis of synovial fibroblasts  
15 by cartilage extracellular matrix protein matrilins. *Osteoarthritis Cartilage* **16**: 1110–1117.
- 16 Pirvola U, Ylikoski J, Trokovic R, Hébert JM, McConnell SK, Partanen J. 2002. FGFR1 is  
17 required for the development of the auditory sensory epithelium. *Neuron* **35**: 671–680.
- 18 Poladia DP, Kish K, Kutay B, Hains D, Kegg H, Zhao H, Bates CM. 2006. Role of fibroblast  
19 growth factor receptors 1 and 2 in the metanephric mesenchyme. *Dev Biol* **291**: 325–  
20 339.
- 21 Puligilla C, Dabdoub A, Brenowitz SD, Kelley MW. 2010. Sox2 Induces Neuronal Formation in  
22 the Developing Mammalian Cochlea. *J Neurosci* **30**: 714–722.
- 23 Radde-Gallwitz K, Pan L, Gan L, Lin X, Segil N, Chen P. 2004. Expression of Islet1 marks the  
24 sensory and neuronal lineages in the mammalian inner ear. *J Comp Neurol* **477**: 412–  
25 421.
- 26 Rau A, Legan PK, Richardson GP. 1999. Tectorin mRNA expression is spatially and temporally  
27 restricted during mouse inner ear development. *J Comp Neurol* **405**: 271–280.

- 1 Risso D, Ngai J, Speed TP, Dudoit S. 2014. Normalization of RNA-seq data using factor  
2 analysis of control genes or samples. *Nat Biotechnol* **32**: 896.
- 3 Rossmiller DR, Pasic TR. 1994. Hearing loss in Townes-Brocks syndrome. *Otolaryngol--Head  
4 Neck Surg Off J Am Acad Otolaryngol-Head Neck Surg* **111**: 175–180.
- 5 Russell IJ, Legan PK, Lukashkina VA, Lukashkin AN, Goodyear RJ, Richardson GP. 2007.  
6 Sharpened cochlear tuning in a mouse with a genetically modified tectorial membrane.  
7 *Nat Neurosci* **10**: 215–223.
- 8 Saburi S, Hester I, Goodrich L, McNeill H. 2012. Functional interactions between Fat family  
9 cadherins in tissue morphogenesis and planar polarity. *Development* **139**: 1806–1820.
- 10 Sánchez-Guardado LÓ, Ferran JL, Rodríguez-Gallardo L, Puellas L, Hidalgo-Sánchez M. 2011.  
11 Meis gene expression patterns in the developing chicken inner ear. *J Comp Neurol* **519**:  
12 125–147.
- 13 Schindelin J, Arganda-Carreras I, Frise E, Kaynig V, Longair M, Pietzsch T, Preibisch S,  
14 Rueden C, Saalfeld S, Schmid B, et al. 2012. Fiji: an open-source platform for biological-  
15 image analysis. *Nat Methods* **9**: 676–682.
- 16 Schraders M, Haas SA, Weegerink NJD, Oostrik J, Hu H, Hoefsloot LH, Kannan S, Huygen  
17 PLM, Pennings RJE, Admiraal RJC, et al. 2011. Next-generation sequencing identifies  
18 mutations of SMPX, which encodes the small muscle protein, X-linked, as a cause of  
19 progressive hearing impairment. *Am J Hum Genet* **88**: 628–634.
- 20 Sharlin DS, Visser TJ, Forrest D. 2011. Developmental and cell-specific expression of thyroid  
21 hormone transporters in the mouse cochlea. *Endocrinology* **152**: 5053–5064.
- 22 Snel B, Lehmann G, Bork P, Huynen MA. 2000. STRING: a web-server to retrieve and display  
23 the repeatedly occurring neighbourhood of a gene. *Nucleic Acids Res* **28**: 3442–3444.
- 24 Somma G, Alger HM, McGuire RM, Kretlow JD, Ruiz FR, Yatsenko SA, Stankiewicz P, Harrison  
25 W, Funk E, Bergamaschi A, et al. 2012. Head bobber: an insertional mutation causes  
26 inner ear defects, hyperactive circling, and deafness. *J Assoc Res Otolaryngol JARO* **13**:  
27 335–349.

- 1 Szklarczyk D, Gable AL, Lyon D, Junge A, Wyder S, Huerta-Cepas J, Simonovic M, Doncheva  
2 NT, Morris JH, Bork P, et al. 2019. STRING v11: protein-protein association networks  
3 with increased coverage, supporting functional discovery in genome-wide experimental  
4 datasets. *Nucleic Acids Res* **47**: D607–D613.
- 5 Urness LD, Li C, Wang X, Mansour SL. 2008. Expression of ERK signaling inhibitors Dusp6,  
6 Dusp7, and Dusp9 during mouse ear development. *Dev Dyn* **237**: 163–169.
- 7 Usami S, Takumi Y, Suzuki N, Oguchi T, Oshima A, Suzuki H, Kitoh R, Abe S, Sasaki A,  
8 Matsubara A. 2008. The localization of proteins encoded by CRYM, KIAA1199, UBA52,  
9 COL9A3, and COL9A1, genes highly expressed in the cochlea. *Neuroscience* **154**: 22–  
10 28.
- 11 Waldhaus J, Durruthy-Durruthy R, Heller S. 2015. Quantitative High-Resolution Cellular Map of  
12 the Organ of Corti. *Cell Rep* **11**: 1385–1399.
- 13 Wang W, Chan EK, Baron S, Van De Water TR, Lufkin T. 2001. Hmx2 homeobox gene control  
14 of murine vestibular morphogenesis. *Development* **128**: 5017–5029.
- 15 Willardsen M, Hutcheson DA, Moore KB, Vetter ML. 2014. The ETS transcription factor Etv1  
16 mediates FGF signaling to initiate proneural gene expression during *Xenopus laevis*  
17 retinal development. *Mech Dev* **131**: 57–67.
- 18 Wong ACY, Ryan AF. 2015. Mechanisms of sensorineural cell damage, death and survival in  
19 the cochlea. *Front Aging Neurosci* **7**: 58.
- 20 Woods C, Montcouquiol M, Kelley MW. 2004. Math1 regulates development of the sensory  
21 epithelium in the mammalian cochlea. *Nat Neurosci* **7**: 1310–1318.
- 22 Wu DK, Kelley MW. 2012. Molecular Mechanisms of Inner Ear Development. *Cold Spring Harb*  
23 *Perspect Biol* **4**: a008409.
- 24 Wu L, Sagong B, Choi JY, Kim U-K, Bok J. 2013. A systematic survey of carbonic anhydrase  
25 mRNA expression during mammalian inner ear development. *Dev Dyn Off Publ Am*  
26 *Assoc Anat* **242**: 269–280.
- 27 Yamamoto N, Okano T, Ma X, Adelstein RS, Kelley MW. 2009. Myosin II regulates extension,  
28 growth and patterning in the mammalian cochlear duct. *Development* **136**: 1977–1986.

- 1 Yamasoba T, Lin FR, Someya S, Kashio A, Sakamoto T, Kondo K. 2013. Current concepts in  
2 age-related hearing loss: epidemiology and mechanistic pathways. *Hear Res* **303**: 30–  
3 38.
- 4 Yang LM, Cheah KSE, Huh S-H, Ornitz DM. 2019. Sox2 and FGF20 interact to regulate organ  
5 of Corti hair cell and supporting cell development in a spatially-graded manner. *PLoS*  
6 *Genet* **15**: e1008254.
- 7 Yang LM, Huh S-H, Ornitz DM. 2018. FGF20-Expressing, Wnt-Responsive Olfactory Epithelial  
8 Progenitors Regulate Underlying Turbinate Growth to Optimize Surface Area. *Dev Cell*  
9 **46**: 564-580.e5.
- 10 Yang Y, Kim AH, Yamada T, Wu B, Bilimoria PM, Ikeuchi Y, de la Iglesia N, Shen J, Bonni A.  
11 2009. A Cdc20-APC ubiquitin signaling pathway regulates presynaptic differentiation.  
12 *Science* **326**: 575–578.
- 13 Yoon H, Lee DJ, Kim MH, Bok J. 2011. Identification of genes concordantly expressed with  
14 Atoh1 during inner ear development. *Anat Cell Biol* **44**: 69–78.
- 15 Zhou P, Zhang Y, Ma Q, Gu F, Day DS, He A, Zhou B, Li J, Stevens SM, Romo D, et al. 2013.  
16 Interrogating translational efficiency and lineage-specific transcriptomes using ribosome  
17 affinity purification. *Proc Natl Acad Sci U S A* **110**: 15395–15400.
- 18 Zhu H, Mitsuhashi N, Klein A, Barsky LW, Weinberg K, Barr ML, Demetriou A, Wu GD. 2006.  
19 The role of the hyaluronan receptor CD44 in mesenchymal stem cell migration in the  
20 extracellular matrix. *Stem Cells Dayt Ohio* **24**: 928–935.

21  
22

## 23 **FIGURE LEGENDS**

24

25 **Figure 1. *Fgf20*<sup>Cre</sup> targets L10a-eGFP expression to the cochlear prosensory domain and**  
26 **Kölliker's organ**

27 (A) Schematic representing cross-sectional view through the E14.5 and P0 cochlear duct. At  
28 E14.5, the epithelium at the cochlear duct floor can be divided into three regions: outer  
29 sulcus (OS), prosensory domain (PD), and Kölliker's organ (KO). Cells from these three

- 1 regions contribute to the lesser epithelial ridge (LER), organ of Corti (OC), and greater  
2 epithelial ridge (GER), respectively, at P0. Double-headed arrow indicates medial  
3 (neural) and lateral (abneural) directions.
- 4 (B) Sections through the middle turn of E14.5 and P0 *Fgf20<sup>Cre/+</sup>; ROSA<sup>fsTRAP/+</sup>* cochlear ducts,  
5 showing L10a-eGFP (green) expression. At E14.5, L10a-eGFP is found in the  
6 prosensory domain (PD; bracket), Kölliker's organ and medial wall, and spiral ganglion  
7 (SG). At P0, it is found in the organ of Corti (OC; bracket) and greater epithelial ridge.  
8 DAPI, nuclei (blue); scale bar, 100  $\mu$ m.
- 9 (C) Section through the middle turn of E14.5 cochlear ducts from *Fgf20<sup>Cre/+</sup>; ROSA<sup>mTmG/+</sup>* and  
10 *Fgf20<sup>Cre/ $\beta$ gal</sup>; ROSA<sup>mTmG/+</sup>* embryos. Cells of the *Fgf20<sup>Cre</sup>*-lineage express mGFP (mG,  
11 green); non-lineage cells express mTomato (mT, red). DAPI, nuclei (blue); scale bar,  
12 100  $\mu$ m.
- 13 (D) Schematic showing an overview of the TRAPseq protocol (see Experimental  
14 Procedures). 1) Ventral otocysts containing the cochlea were dissected from E14.5  
15 embryos. 2) Otocysts from each litter were pooled according to genotype to increase  
16 RNA yield. 3) Otocysts were then homogenized and centrifuged to make polysomes  
17 before immunoprecipitation with anti-GFP antibodies to collect L10a-eGFP labelled  
18 polysomes, 4) which were then used for downstream applications.
- 19 (E) qRT-PCR showing fold change in *Twist2* and *Id2* expression (normalized to *Gadph*) in  
20 TRAP RNA samples compared to pre-TRAP samples from *Fgf20<sup>Cre/+</sup>; ROSA<sup>mTmG/+</sup>* E14.5  
21 cochleae pooled from at least three embryos. Each dot represents a pooled sample.  
22

23 **Figure 2. *Fgf20<sup>Cre</sup>* TRAPseq enriched for prosensory domain mRNA**

- 24 (A) Principal Component Analysis (PCA) on 24 TRAPseq samples (8 pre-TRAP samples – 4  
25 *Fgf20<sup>+/+</sup>*, 4 *Fgf20<sup>-/-</sup>*; 16 TRAP samples – 8 *Fgf20<sup>+/+</sup>*, 8 *Fgf20<sup>-/-</sup>*) showing separation of pre-  
26 TRAP and TRAP samples along principal component (PC) 1, but not of *Fgf20<sup>+/+</sup>* and  
27 *Fgf20<sup>-/-</sup>* samples.
- 28 (B) PCA on the 16 TRAP samples (excluding the 8 pre-TRAP samples) also did not show  
29 separation between *Fgf20<sup>+/+</sup>* and *Fgf20<sup>-/-</sup>* samples along the first two principal  
30 components.
- 31 (C) Volcano plot showing TRAP vs. pre-TRAP differentially expressed genes. Positive Log<sub>2</sub>  
32 Fold Change value indicates enrichment by TRAP; negative Log<sub>2</sub> Fold Change value  
33 indicates depletion by TRAP. Labeled genes represent markers of the prosensory  
34 domain, Kölliker's organ, spiral ganglion, outer sulcus, periotic mesenchyme, otic

1 capsule. Padj, adjusted p-value for multiple comparisons (Benjamini-Hochberg method).  
2 The p-value plotted on y-axis is unadjusted. Arrowheads indicate genes above y-axis  
3 range.

4  
5 **Figure 3. *Fgf20*<sup>Cre</sup> TRAPseq revealed known FGF target genes during cochlear sensory**  
6 **epithelium differentiation**

- 7 (A) Volcano plot showing *Fgf20*<sup>+/-</sup> vs. *Fgf20*<sup>-/-</sup> differentially expressed genes. *Fgf20* and  
8 transcripts meeting the criteria padj < 0.1 and Log<sub>2</sub> Fold Change < -1 or > 1 are labeled,  
9 except predicted genes and unnamed transcripts. padj, adjusted p-value for multiple  
10 comparisons (Benjamini-Hochberg method). The p-value plotted on y-axis is unadjusted.  
11 Arrowheads indicate genes above y-axis range.
- 12 (B) RNA in situ hybridization for known FGF target genes *Dusp6*, *Etv1*, *Spry1*, and *Spry4* on  
13 sections through the middle turn of E14.5 *Fgf20*<sup>+/-</sup> (*Fgf20*<sup>Cre/+</sup>) and *Fgf20*<sup>-/-</sup> (*Fgf20*<sup>Cre/βgal</sup>)  
14 cochlear ducts. Bracket, prosensory domain. Arrowhead, increased expression of *Etv1*  
15 in the outer sulcus of *Fgf20*<sup>-/-</sup> cochleae. Scale bar, 100 μm.

16  
17 **Figure 4. *Fgf20*<sup>Cre</sup> TRAPseq revealed many genes associated with cochlea development or**  
18 **hearing loss**

- 19 RNA in situ hybridization on sections through the middle turn of E14.5 *Fgf20*<sup>+/-</sup>  
20 (*Fgf20*<sup>Cre/+</sup>) and *Fgf20*<sup>-/-</sup> (*Fgf20*<sup>Cre/βgal</sup>) cochlear ducts. Bracket, prosensory domain. Scale  
21 bar, 100 μm.
- 22 (A) Genes *Tectb*, *Tecta*, *Smpx*, *Epyc*, *Fat3*, and *Heyl*  
23 (B) Genes *Gata2*, *Meis2*, *Lmx1a*, and *Bmp4*

24  
25 **Figure 5. *Fgf20*<sup>Cre</sup> TRAPseq revealed decreased expression of cell cycle regulators**

- 26 (A) The largest protein-protein interaction network identified via the STRING database  
27 consisted of genes involved in cell cycle regulation. Lines represent known and  
28 predicted protein-protein interactions of high or very high confidence (minimum required  
29 interaction score = 0.700).
- 30 (B) Dissected inner ears from E18.5 *Cdc20*<sup>CHet</sup> (*Fgf20*<sup>Cre/+</sup>; *Cdc20*<sup>flox/+</sup>) and *Cdc20*<sup>CKO</sup>  
31 (*Fgf20*<sup>Cre/+</sup>; *Cdc20*<sup>flox/flox</sup>) embryos with otic capsule removed to reveal the cochlea (dotted  
32 lines). Scale bar, 0.5 mm. Quantification of cochlea length measured using whole mount  
33 cochlea *Cdc20*<sup>CHet</sup> (n = 4) and *Cdc20*<sup>CKO</sup> (n = 5). Error bars represent mean ± std.  
34 Results were analyzed by Student's t-test; p-values are shown.

- 1 (C) Whole mount cochlea from E18.5 *Cdc20<sup>CHet</sup>* and *Cdc20<sup>CKO</sup>* embryos showing one row of  
2 inner hair cells (IHC) and three rows of outer hair cells (OHC) marked by phalloidin  
3 (green) and separated by inner pillar cells (p75NTR, red). Representative regions from  
4 the basal, mid-basal, and mid-apical turns, and apical tip of the cochlea are shown. See  
5 schematic below showing locations of the turns of the cochlea. At the apical tip, four or  
6 more rows of OHCs frequently observed in *Cdc20<sup>CHet</sup>* cochleae. Scale bar, 100  $\mu$ m.  
7 (D) Quantification of total number of inner and outer hair cells (IHCs and OHCs) in E18.5  
8 *Cdc20<sup>CHet</sup>* (n = 4) and *Cdc20<sup>CKO</sup>* (n = 5) cochleae. Error bars represent mean  $\pm$  std.  
9 Results were analyzed by Student's t-test; p-values are shown.

10 **Figure 6. *Sall1*- $\Delta$ *Zn2-10* mutant cochleae exhibit an outer hair cell phenotype**

- 11 (A) RNA in situ hybridization for *Sall1*, *Sall2*, and *Sall3* on sections through the middle turn  
12 of E14.5 *Fgf20<sup>-/+</sup>* (*Fgf20<sup>Cre/+</sup>*) and *Fgf20<sup>-/-</sup>* (*Fgf20<sup>Cre/ $\beta$ gal</sup>*) cochlear ducts. Bracket,  
13 prosensory domain. Scale bar, 100  $\mu$ m.  
14 (B) Whole mount cochlea from E18.5 *Sall1<sup>+/+</sup>*, *Sall1 <sup>$\Delta$ /+</sup>*, and *Sall1 <sup>$\Delta$ / $\Delta$</sup>*  embryos showing inner  
15 hair cells and outer hair cells marked by phalloidin (green) and separated by inner pillar  
16 cells (p75NTR, red). Representative regions from the basal (5% of total length from the  
17 basal tip), mid-basal (33%), and mid-apical (67%) turns, and apical tip (90%) of the  
18 cochlea are shown. See schematic to the right showing locations of the turns of the  
19 cochlea. Inset: 3.8x magnified image of a representative OHC showing stereocilia  
20 bundle formation (arrows in mid-apical region). Numerous ectopic inner hair cells were  
21 found throughout the *Sall1 <sup>$\Delta$ / $\Delta$</sup>*  cochleae, especially towards the apex (arrowheads). Scale  
22 bar, 100  $\mu$ m.  
23 (C) Quantification of cochlea length, total number of inner hair cells (IHCs) and outer hair  
24 cells (OHCs), and total number of ectopic IHCs in E18.5 *Sall1<sup>+/+</sup>* (n = 7), *Sall1 <sup>$\Delta$ /+</sup>* (n = 8),  
25 and *Sall1 <sup>$\Delta$ / $\Delta$</sup>*  (n = 2). Error bars represent mean  $\pm$  std. Results were analyzed by one-way  
26 ANOVA. P-values shown are from the ANOVA. \* indicates p < 0.05 from Tukey's HSD  
27 (ANOVA post-hoc).

28  
29

30 **FOOTNOTES**

31

32 Data availability: The data discussed in this publication have been deposited in NCBI's Gene  
33 Expression Omnibus (Edgar et al. 2002) and are accessible through GEO Series accession  
34 number GSE148380 (<https://www.ncbi.nlm.nih.gov/geo/query/acc.cgi?acc=GSE148380>).

- 1
- 2 Supplemental files:
- 3 S1 – preTRAP vs. TRAP DEG analysis
- 4 S2 – *Fgf20*<sup>+/+</sup> vs. *Fgf20*<sup>-/-</sup> DEG analysis
- 5
- 6 List of abbreviations:
- 7 DEG – differentially expressed gene
- 8 GER – greater epithelial ridge
- 9 HC – hair cell
- 10 IHC – inner hair cell
- 11 IP – immunoprecipitation
- 12 KO – Kölliker’s organ
- 13 LER – lesser epithelial ridge
- 14 OC – organ of Corti
- 15 OHC – outer hair cell
- 16 OS – outer sulcus
- 17 padj – adjusted p-value
- 18 PCA – principal component analysis
- 19 PD – prosensory domain
- 20 SC – supporting cell
- 21 TBS – Townes-Brocks syndrome
- 22 TRAP – translating ribosome affinity purification
- 23 TRAPseq – TRAP combined with next generation mRNA sequencing
- 24
- 25

## 26 **TABLES AND FIGURES**



**Table 1.** Top 12 enriched gene ontology (GO) terms from a list of 2017 differentially expressed genes depleted by TRAP, compared to pre-TRAP samples.

| <b>Rank*</b> | <b>GO ID</b> | <b>GO biological processes term</b>                    | <b>p-value</b> |
|--------------|--------------|--------------------------------------------------------|----------------|
| 1            | GO:0006954   | inflammatory response                                  | 3.30E-15       |
| 2            | GO:0001525   | angiogenesis                                           | 1.60E-12       |
| 3            | GO:0030198   | extracellular matrix organization                      | 2.20E-11       |
| 4            | GO:0045766   | positive regulation of angiogenesis                    | 2.20E-10       |
| 5            | GO:0070374   | positive regulation of ERK1 and ERK2 cascade           | 2.70E-10       |
| 6            | GO:0001974   | blood vessel remodeling                                | 3.20E-10       |
| 7            | GO:0007155   | cell adhesion                                          | 8.80E-10       |
| 8            | GO:0030593   | neutrophil chemotaxis                                  | 2.00E-09       |
| 9            | GO:0002548   | monocyte chemotaxis                                    | 8.70E-09       |
| 10           | GO:0007186   | G-protein coupled receptor signaling pathway           | 5.10E-08       |
| 11           | GO:0090090   | negative regulation of canonical Wnt signaling pathway | 2.20E-07       |
| 12           | GO:0001958   | endochondral ossification                              | 2.80E-07       |

\* Rank by p-value (lowest to highest).

**Table 2.** Top 12 enriched gene ontology (GO) terms from a list of 1833 differentially expressed genes enriched by TRAP, compared to pre-TRAP samples.

| <b>Rank*</b> | <b>GO ID</b> | <b>GO biological processes term</b>                   | <b>p-value</b> |
|--------------|--------------|-------------------------------------------------------|----------------|
| 1            | GO:0007605   | sensory perception of sound                           | 6.30E-09       |
| 2            | GO:0007411   | axon guidance                                         | 3.30E-08       |
| 3            | GO:0048791   | calcium ion-regulated exocytosis of neurotransmitter  | 7.00E-08       |
| 4            | GO:0048172   | regulation of short-term neuronal synaptic plasticity | 1.20E-06       |
| 5            | GO:0042391   | regulation of membrane potential                      | 2.00E-06       |
| 6            | GO:0007626   | locomotory behavior                                   | 3.00E-06       |
| 7            | GO:0050885   | neuromuscular process controlling balance             | 3.60E-06       |
| 8            | GO:0019228   | neuronal action potential                             | 7.20E-06       |
| 9            | GO:0014059   | regulation of dopamine secretion                      | 9.90E-06       |
| 10           | GO:0017158   | regulation of calcium ion-dependent exocytosis        | 1.10E-05       |
| 11           | GO:0060088   | auditory receptor cell stereocilium organization      | 1.70E-05       |
| 12           | GO:0045665   | negative regulation of neuron differentiation         | 2.30E-05       |

\* Rank by p-value (lowest to highest).

**Table 3.** Top enriched gene ontology (GO) terms from a list of top 362 *Fgf20*<sup>+/+</sup> vs. *Fgf20*<sup>-/-</sup> differentially expressed genes.

| Rank* | GO ID      | GO biological processes term                      | p-value  |
|-------|------------|---------------------------------------------------|----------|
| 1     | GO:0003184 | pulmonary valve morphogenesis                     | 5.40E-06 |
| 2     | GO:0045664 | regulation of neuron differentiation              | 6.80E-05 |
| 3     | GO:0007605 | sensory perception of sound                       | 1.50E-04 |
| 5     | GO:0007601 | visual perception                                 | 3.60E-04 |
| 6     | GO:0001709 | cell fate determination                           | 4.10E-04 |
| 7     | GO:0046426 | negative regulation of JAK-STAT cascade           | 4.10E-04 |
| 9     | GO:0021879 | forebrain neuron differentiation                  | 6.10E-04 |
| 12    | GO:0051301 | cell division                                     | 1.12E-03 |
| 13    | GO:0021795 | cerebral cortex cell migration                    | 1.21E-03 |
| 14    | GO:0009948 | anterior/posterior axis specification             | 1.23E-03 |
| 21    | GO:0090596 | sensory organ morphogenesis                       | 1.77E-03 |
| 28    | GO:0043583 | ear development                                   | 2.50E-03 |
| 30    | GO:2000177 | regulation of neural precursor cell proliferation | 2.70E-03 |
| 33    | GO:0045596 | negative regulation of cell differentiation       | 3.29E-03 |
| 35    | GO:0031175 | neuron projection development                     | 3.46E-03 |
| 38    | GO:0060113 | inner ear receptor cell differentiation           | 4.33E-03 |
| 39    | GO:0007050 | cell cycle arrest                                 | 4.76E-03 |

\* Rank by p-value (lowest to highest).

**Table 4.** *Fgf20*<sup>+/+</sup> vs. *Fgf20*<sup>-/-</sup> differentially expressed genes associated with FGF signaling.

| Rank* | Ensembl ID          | Gene         | Enrichment <sup>^</sup> | Log2FC <sup>&amp;</sup> | padj <sup>#</sup> |
|-------|---------------------|--------------|-------------------------|-------------------------|-------------------|
| 9     | ENSMUSG000000019960 | <i>Dusp6</i> | enriched                | -0.79                   | <0.001            |
| 21    | ENSMUSG000000004151 | <i>Etv1</i>  | depleted                | -0.72                   | <0.001            |
| 36    | ENSMUSG000000017724 | <i>Etv4</i>  | ENRICHED                | -0.60                   | <0.01             |
| 23    | ENSMUSG000000013089 | <i>Etv5</i>  | -                       | -0.55                   | <0.001            |
| 74    | ENSMUSG000000031603 | <i>Fgf20</i> | ENRICHED                | -0.93                   | 0.03              |
| 50    | ENSMUSG000000040289 | <i>Hey1</i>  | ENRICHED                | -0.55                   | 0.01              |
| 5     | ENSMUSG000000019789 | <i>Hey2</i>  | ENRICHED                | -1.12                   | <0.001            |
| 106   | ENSMUSG000000037211 | <i>Spry1</i> | ENRICHED                | -0.45                   | 0.10              |
| 87    | ENSMUSG000000024427 | <i>Spry4</i> | depleted                | -0.45                   | 0.06              |

\* Rank by padj (lowest to highest).

<sup>^</sup> Enrichment by TRAP: results of TRAP vs. pre-TRAP comparison. Enriched indicates Log<sub>2</sub> Fold Change > 0 and padj < 0.05. Depleted indicates Log<sub>2</sub> Fold Change < 0 and padj < 0.05. Upper case indicates Log<sub>2</sub> Fold Change > 1 or < -1. Dash (-) indicates padj > 0.05.

<sup>&</sup> Log<sub>2</sub> Fold Change of *Fgf20*<sup>+/+</sup> vs. *Fgf20*<sup>-/-</sup> comparison.

<sup>#</sup> Adjusted p-value of *Fgf20*<sup>+/+</sup> vs. *Fgf20*<sup>-/-</sup> comparison.

**Table 5.** *Fgf20*<sup>+/+</sup> vs. *Fgf20*<sup>-/-</sup> differentially expressed genes associated with hearing or cochlear development.

| Rank* | Ensembl ID         | Gene          | Enrichment <sup>^</sup> | Log2FC <sup>&amp;</sup> | padj <sup>#</sup> |
|-------|--------------------|---------------|-------------------------|-------------------------|-------------------|
| 236   | ENSMUSG00000021835 | <i>Bmp4</i>   | DEPLETED                | 0.41                    | 0.38              |
| 10    | ENSMUSG00000028222 | <i>Calb1</i>  | ENRICHED                | 0.90                    | <0.001            |
| 16    | ENSMUSG00000027555 | <i>Car13</i>  | enriched                | -0.64                   | <0.001            |
| 331   | ENSMUSG00000003031 | <i>Cdkn1b</i> | -                       | -0.43                   | 0.47              |
| 11    | ENSMUSG00000030862 | <i>Cpxm2</i>  | enriched                | -0.62                   | <0.001            |
| 12    | ENSMUSG00000030905 | <i>Crym</i>   | depleted                | -0.69                   | <0.001            |
| 182   | ENSMUSG00000043969 | <i>Emx2</i>   | -                       | -0.61                   | 0.27              |
| 218   | ENSMUSG00000087095 | <i>Emx2os</i> | -                       | -0.60                   | 0.35              |
| 4     | ENSMUSG00000019936 | <i>Epyc</i>   | depleted                | 1.21                    | <0.001            |
| 31    | ENSMUSG00000074505 | <i>Fat3</i>   | -                       | -0.96                   | <0.01             |
| 47    | ENSMUSG00000015053 | <i>Gata2</i>  | DEPLETED                | 0.55                    | <0.01             |
| 28    | ENSMUSG00000032744 | <i>Heyl</i>   | DEPLETED                | 0.65                    | <0.01             |
| 119   | ENSMUSG00000050100 | <i>Hmx2</i>   | -                       | 0.74                    | 0.11              |
| 96    | ENSMUSG00000026686 | <i>Lmx1a</i>  | depleted                | 0.55                    | 0.08              |
| 49    | ENSMUSG00000098318 | <i>Lockd</i>  | -                       | -0.65                   | 0.01              |
| 29    | ENSMUSG00000036446 | <i>Lum</i>    | -                       | 0.70                    | <0.01             |
| 61    | ENSMUSG00000027210 | <i>Meis2</i>  | DEPLETED                | 0.48                    | 0.02              |
| 168   | ENSMUSG00000030739 | <i>Myh14</i>  | ENRICHED                | -0.41                   | 0.23              |
| 97    | ENSMUSG00000004891 | <i>Nes</i>    | DEPLETED                | -0.78                   | 0.08              |
| 83    | ENSMUSG00000060424 | <i>Pantr1</i> | depleted                | -0.51                   | 0.05              |
| 53    | ENSMUSG00000045515 | <i>Pou3f3</i> | depleted                | -0.42                   | 0.01              |
| 71    | ENSMUSG00000031665 | <i>Sall1</i>  | enriched                | -0.49                   | 0.03              |
| 177   | ENSMUSG00000049532 | <i>Sall2</i>  | ENRICHED                | -0.39                   | 0.26              |
| 89    | ENSMUSG00000024565 | <i>Sall3</i>  | enriched                | -0.59                   | 0.06              |
| 14    | ENSMUSG00000035109 | <i>Shc4</i>   | ENRICHED                | -0.60                   | <0.001            |
| 3     | ENSMUSG00000041476 | <i>Smpx</i>   | ENRICHED                | 1.09                    | <0.001            |
| 225   | ENSMUSG00000074637 | <i>Sox2</i>   | ENRICHED                | -0.45                   | 0.37              |
| 18    | ENSMUSG00000061762 | <i>Tac1</i>   | -                       | -1.01                   | <0.001            |
| 161   | ENSMUSG00000037705 | <i>Tecta</i>  | ENRICHED                | -0.36                   | 0.22              |
| 1     | ENSMUSG00000024979 | <i>Tectb</i>  | ENRICHED                | -1.91                   | <0.001            |
| 128   | ENSMUSG00000021779 | <i>Thrb</i>   | ENRICHED                | 0.45                    | 0.13              |

\* Rank by padj (lowest to highest).

<sup>^</sup> Enrichment by TRAP: results of TRAP vs. pre-TRAP comparison. Enriched indicates Log<sub>2</sub> Fold Change > 0 and padj < 0.05. Depleted indicates Log<sub>2</sub> Fold Change < 0 and padj < 0.05. Upper case indicates Log<sub>2</sub> Fold Change > 1 or < -1. Dash (-) indicates padj > 0.05.

<sup>&</sup> Log<sub>2</sub> Fold Change of *Fgf20*<sup>+/+</sup> vs. *Fgf20*<sup>-/-</sup> comparison.

<sup>#</sup> Adjusted p-value of *Fgf20*<sup>+/+</sup> vs. *Fgf20*<sup>-/-</sup> comparison.

**Table 6.** *Fgf20*<sup>+/+</sup> vs. *Fgf20*<sup>-/-</sup> differentially expressed genes associated with cell cycle regulation.

| Rank* | Ensembl ID         | Gene          | Enrichment <sup>^</sup> | Log2FC <sup>&amp;</sup> | padj <sup>#</sup> |
|-------|--------------------|---------------|-------------------------|-------------------------|-------------------|
| 70    | ENSMUSG00000027715 | <i>Ccna2</i>  | depleted                | -0.33                   | 0.03              |
| 32    | ENSMUSG00000070348 | <i>Ccnd1</i>  | -                       | -0.53                   | <0.01             |
| 120   | ENSMUSG00000033102 | <i>Cdc14b</i> | -                       | -0.49                   | 0.11              |
| 24    | ENSMUSG00000006398 | <i>Cdc20</i>  | depleted                | -0.40                   | <0.001            |
| 222   | ENSMUSG00000024791 | <i>Cdca5</i>  | -                       | -0.30                   | 0.37              |
| 183   | ENSMUSG00000028873 | <i>Cdca8</i>  | -                       | -0.33                   | 0.28              |
| 197   | ENSMUSG00000019942 | <i>Cdk1</i>   | depleted                | -0.29                   | 0.31              |
| 206   | ENSMUSG00000026023 | <i>Cdk15</i>  | ENRICHED                | -0.45                   | 0.32              |
| 121   | ENSMUSG00000037628 | <i>Cdkn3</i>  | depleted                | -0.41                   | 0.12              |
| 159   | ENSMUSG00000026605 | <i>Cenpf</i>  | -                       | -0.92                   | 0.22              |
| 158   | ENSMUSG00000001517 | <i>Foxm1</i>  | depleted                | -0.43                   | 0.22              |
| 95    | ENSMUSG00000027331 | <i>Knstrn</i> | -                       | -0.32                   | 0.07              |
| 146   | ENSMUSG00000020808 | <i>Pimreg</i> | -                       | -0.37                   | 0.18              |
| 147   | ENSMUSG00000030867 | <i>Plk1</i>   | depleted                | -0.38                   | 0.18              |

\* Rank by padj (lowest to highest).

<sup>^</sup> Enrichment by TRAP: results of TRAP vs. pre-TRAP comparison. Enriched indicates Log<sub>2</sub> Fold Change > 0 and padj < 0.05. Depleted indicates Log<sub>2</sub> Fold Change < 0 and padj < 0.05. Upper case indicates Log<sub>2</sub> Fold Change > 1 or < -1. Dash (-) indicates padj > 0.05.

<sup>&</sup> Log<sub>2</sub> Fold Change of *Fgf20*<sup>+/+</sup> vs. *Fgf20*<sup>-/-</sup> comparison.

<sup>#</sup> Adjusted p-value of *Fgf20*<sup>+/+</sup> vs. *Fgf20*<sup>-/-</sup> comparison.

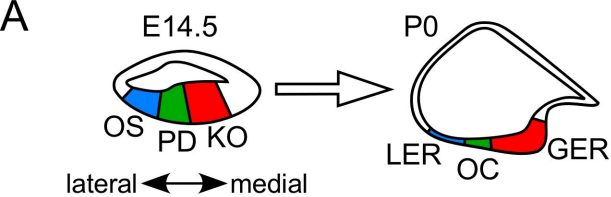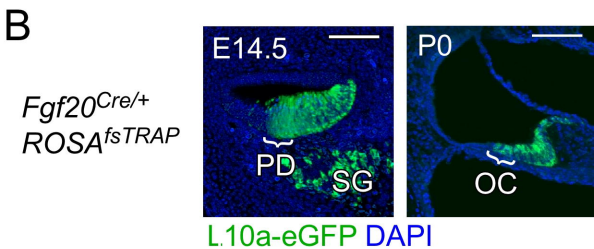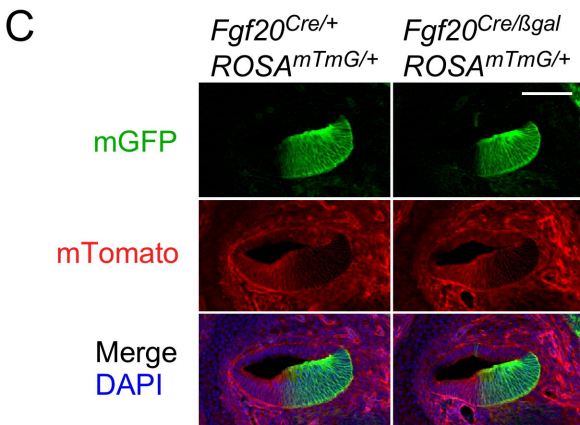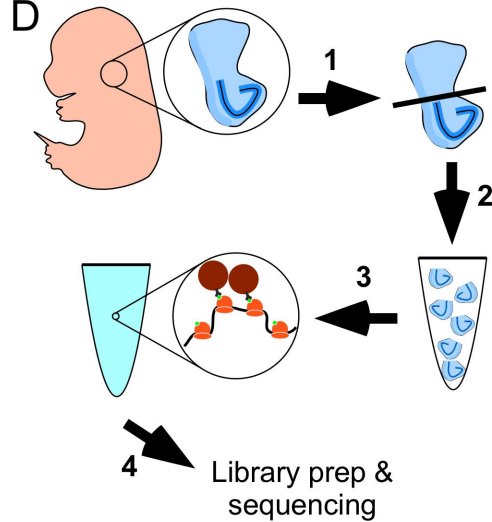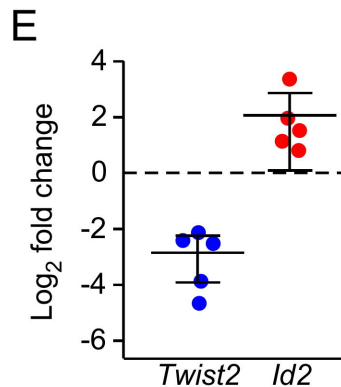

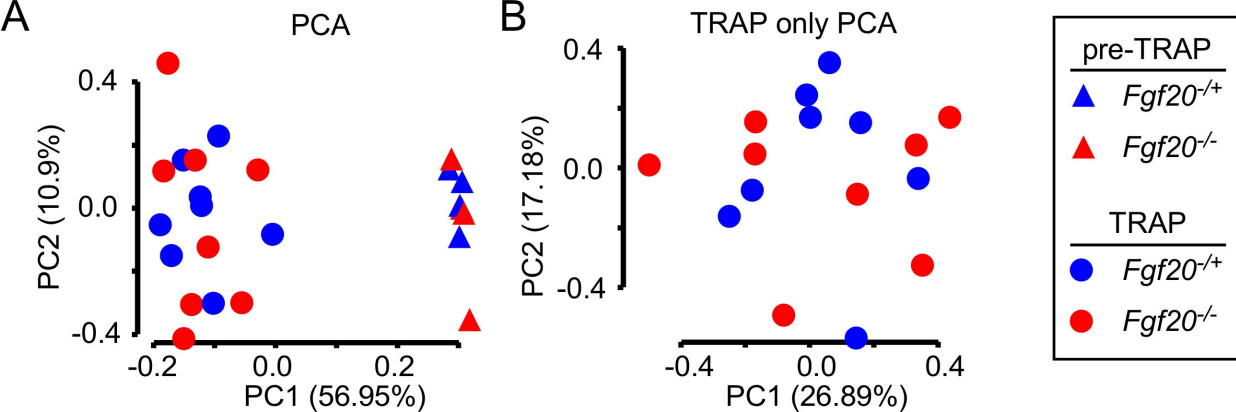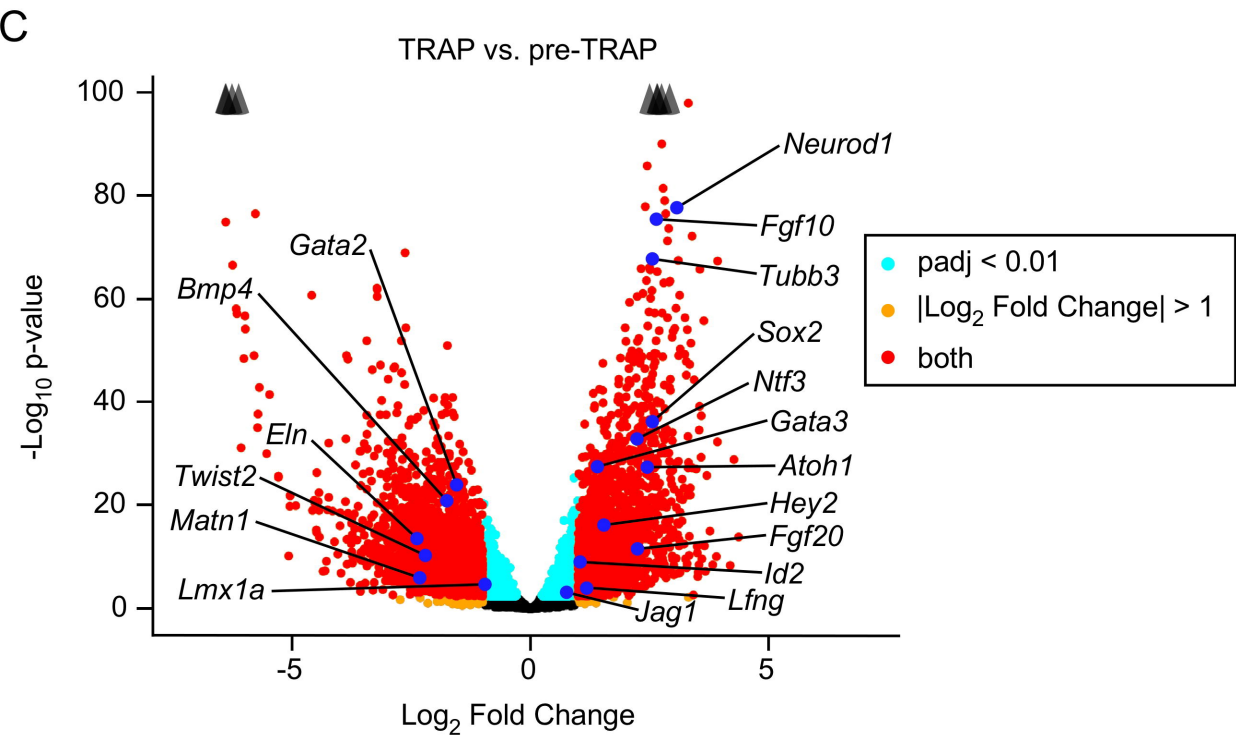



A

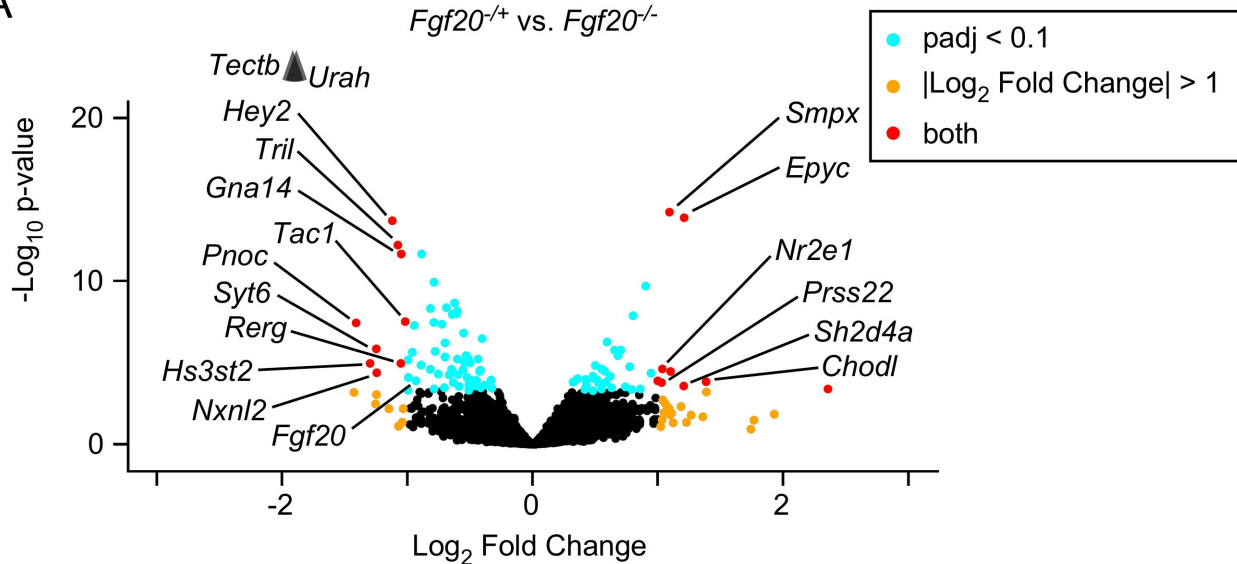

B

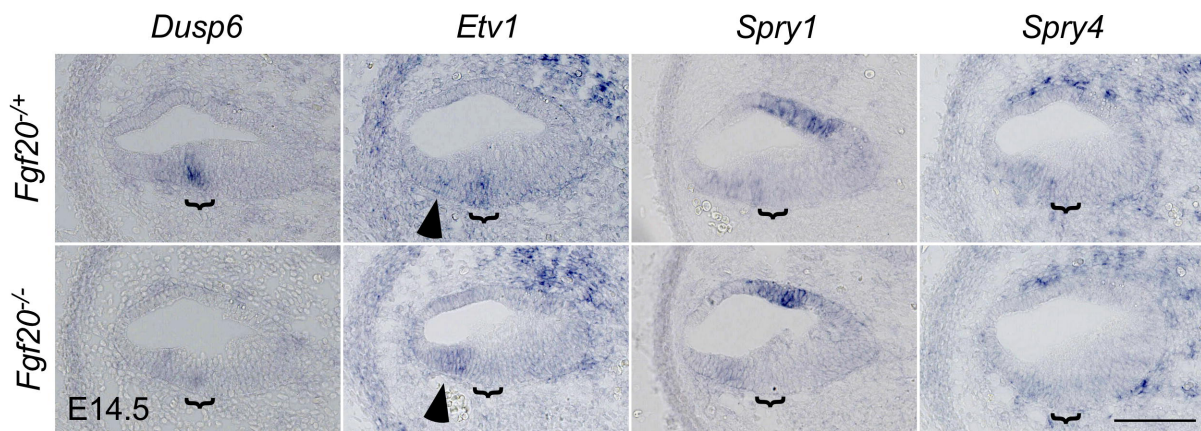

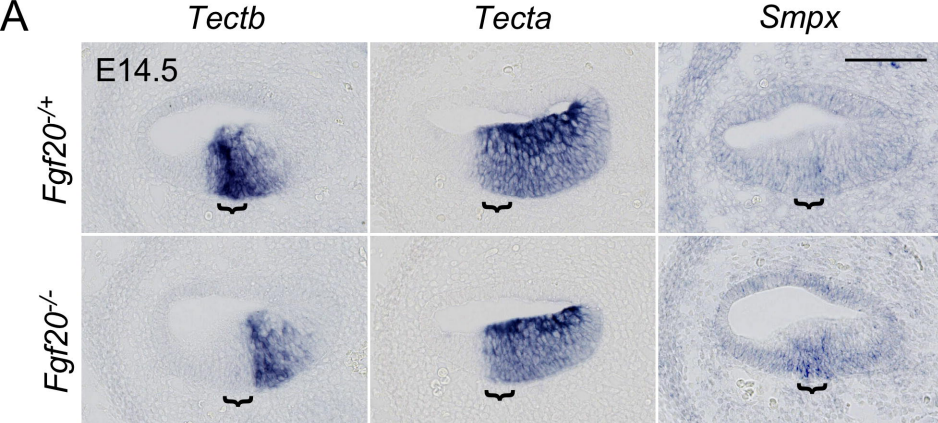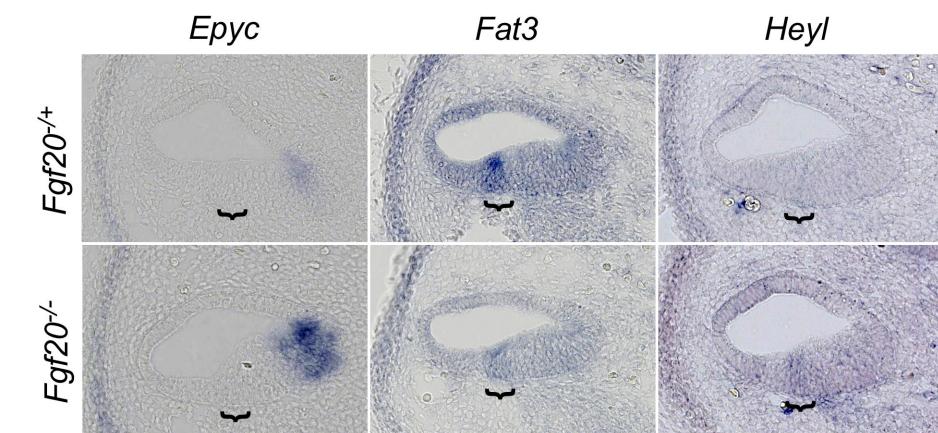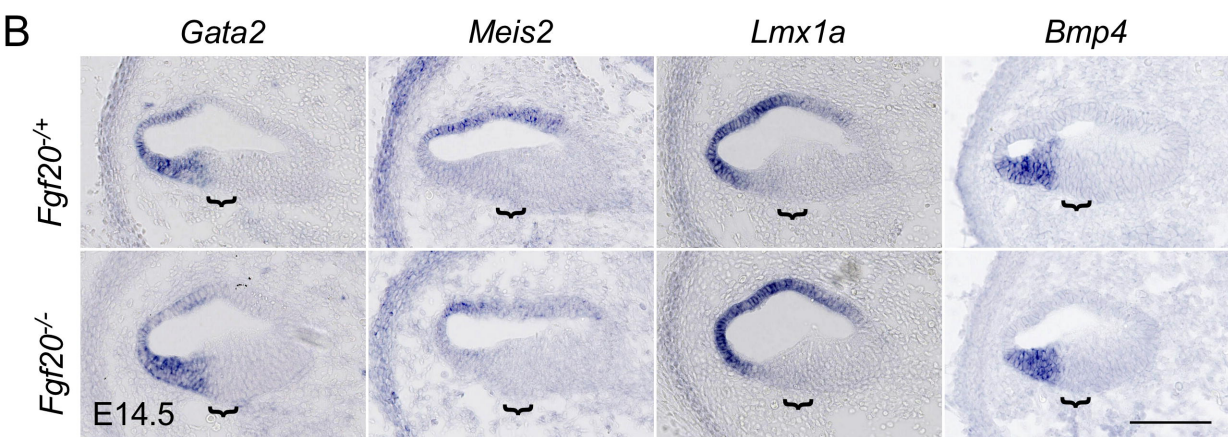

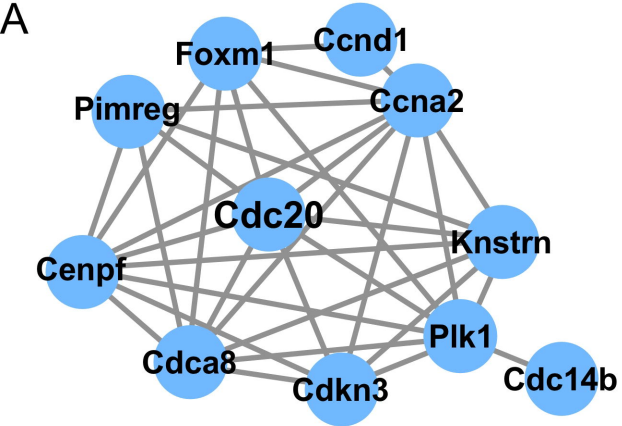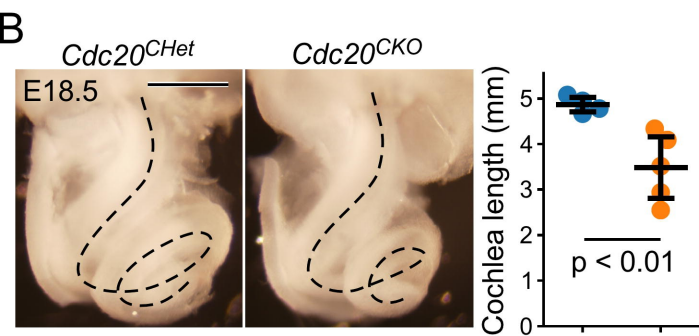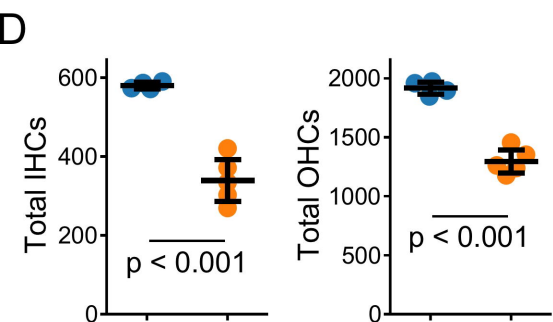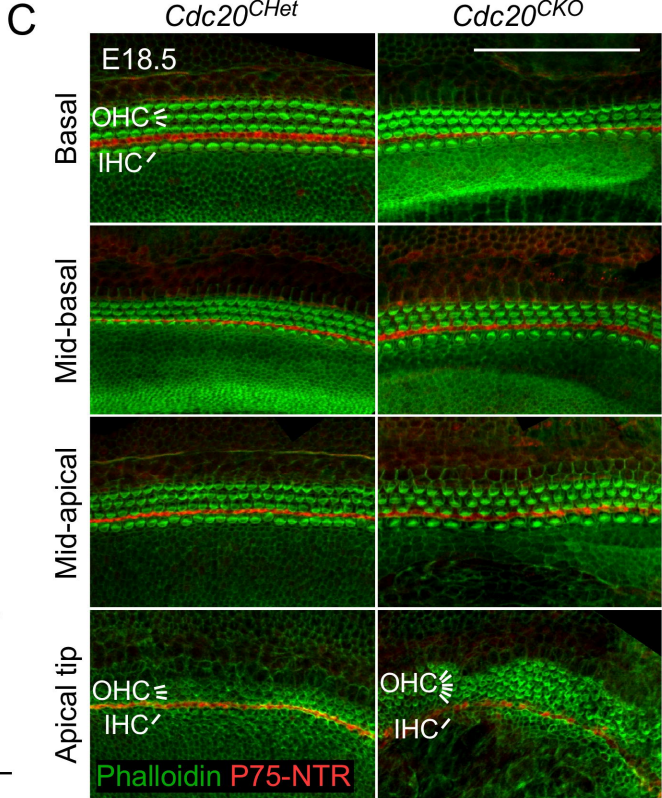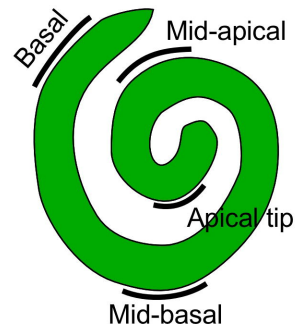

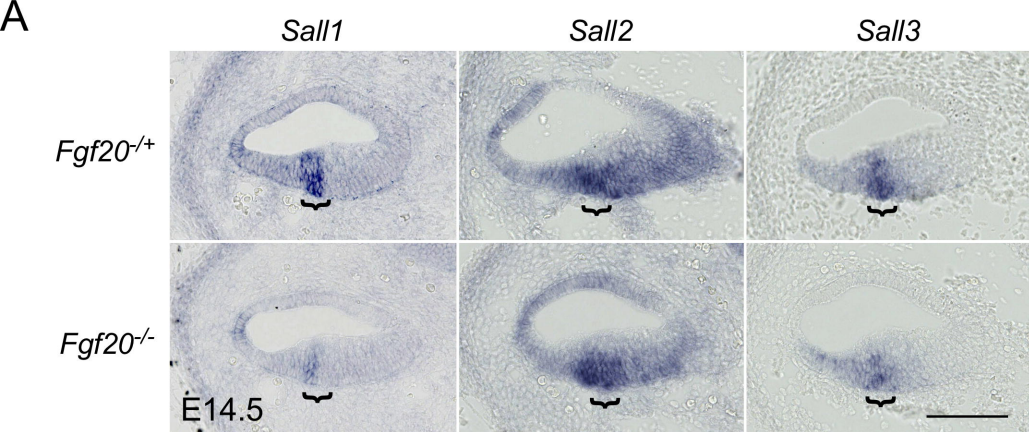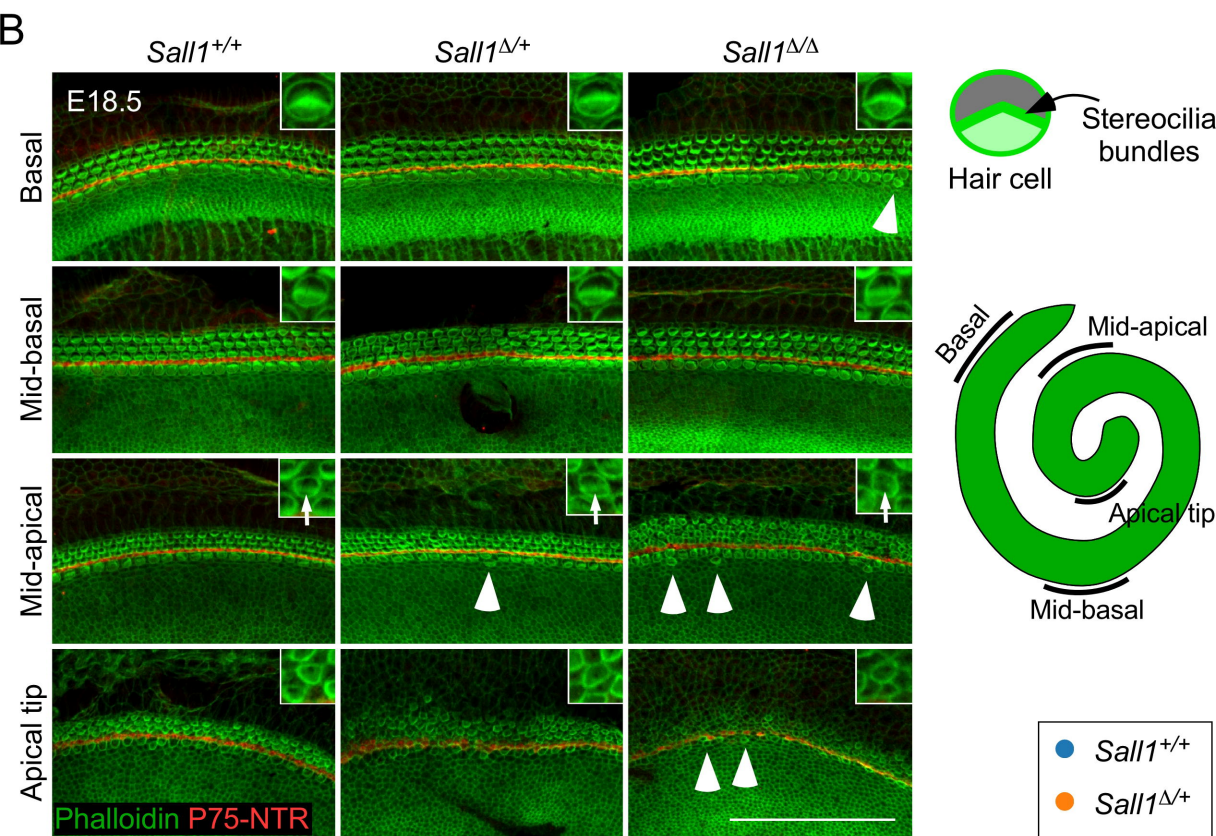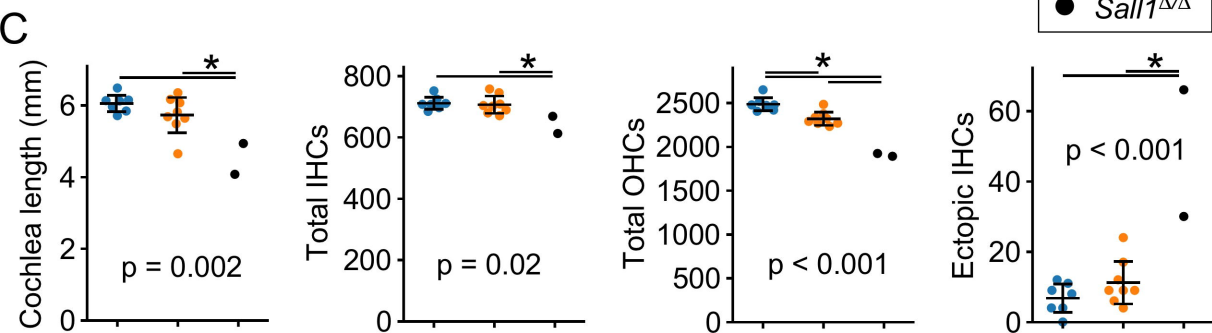

Source: https://www.biorxiv.org/content/10.1101/2020.04.13.040212v1.full.pdf
